# Supplementary material for: Shuffled ATG8 interacting motifs form an ancestral bridge between UFMylation and autophagy
Source: PubMed Central journal article supplement (PMC10183829; doi:10.15252/embj.2022112053), 2023-02-10
Supplement: EMBJ-42-e112053-s002.pdf [file EMBJ-42-e112053-s002.pdf]

## **Appendix table of contents**

Appendix Fig. S1

Appendix Fig. S2

Appendix Fig. S3

Appendix Fig. S4

Appendix Fig. S5

Appendix Fig. S6

Appendix Fig. S7

Appendix Fig. S8

Appendix Fig. S9

Appendix Fig. S10

Appendix Fig. S11

Supplementary Data S1

Supplementary Data S2

# Fig. S1

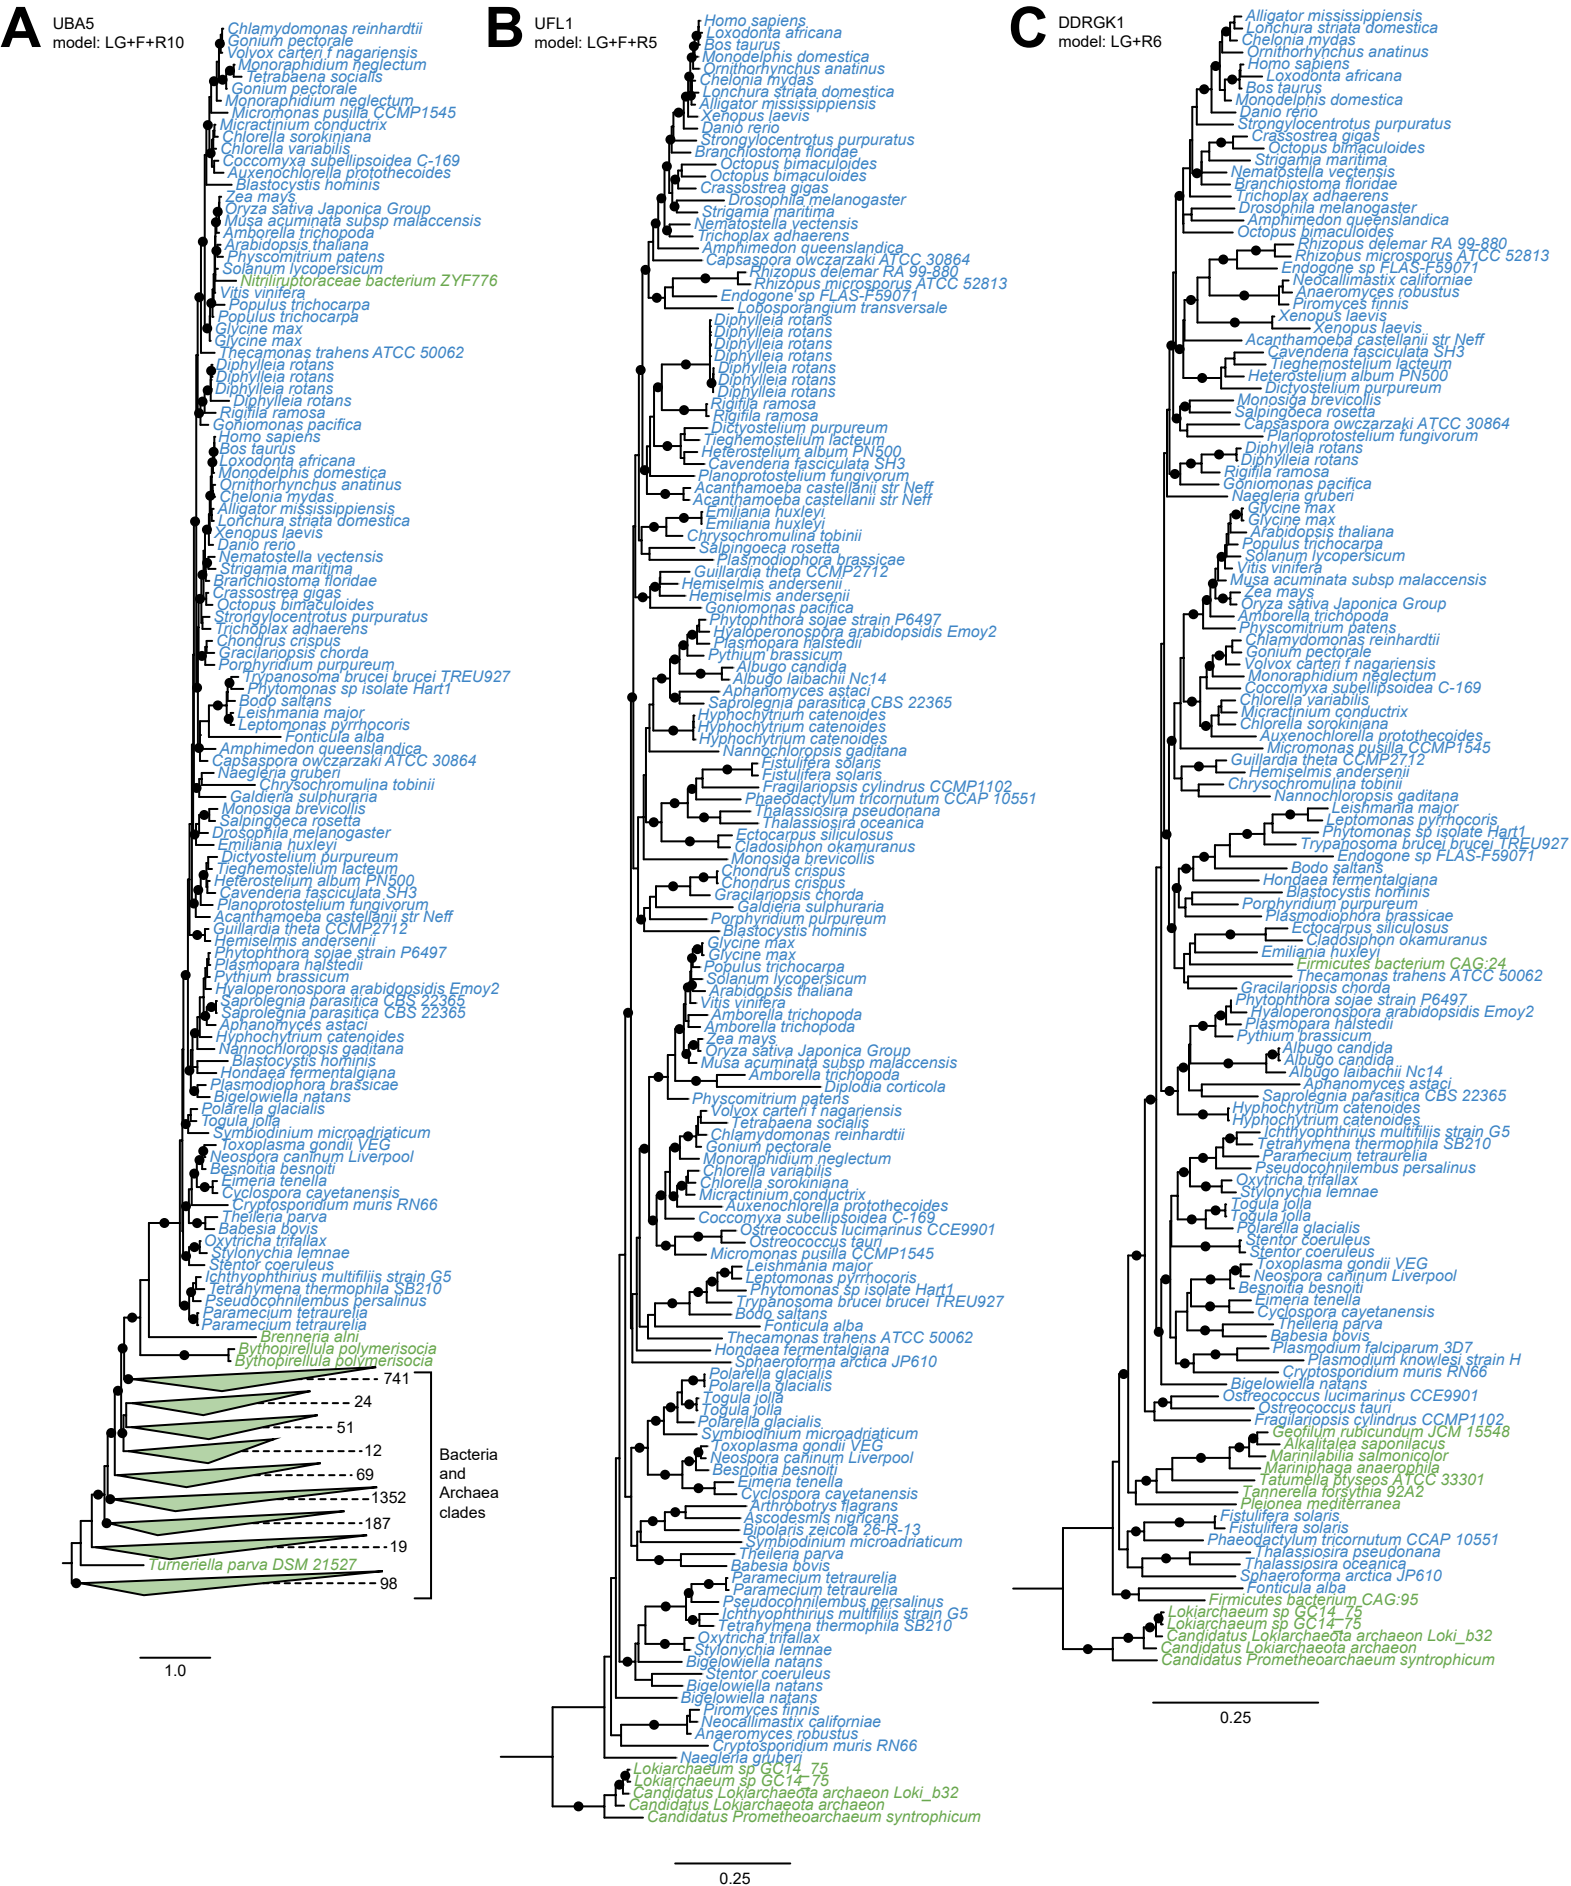

**Appendix Figure S1. The prokaryotic origins of UBA5, UFL1, and DDRGK1.**

Maximum likelihood phylogenies generated from multiple sequence alignments containing eukaryotic and prokaryotic homologs of UBA5 (**A**), UFL1 (**B**), and DDRGK1 (**C**). Eukaryotes and prokaryotes are denoted in blue and green, respectively. Black circles represent SH-aLRT (Shimodaira Hasegawa approximate likelihood ratio tests)  $\geq 0.85$ . Phylogenetic models used for generating each phylogeny and the number of sequences within collapsed nodes are noted. Scale bars represent the number of substitutions per 100 amino acids.

# Fig. S2

## Trimmed RPL26 alignment

### A

UFM1 present

UFM1 absent

|                                    |                                    |
|------------------------------------|------------------------------------|
| <i>Homo sapiens</i>                | RKKILERRKAKSQVQKKEKCKYKEELIEKMQE-- |
| <i>Xenopus laevis</i>              | RKKILERRKAKSQVQKKEKCKYKEELIEKMQE-- |
| <i>Drosophila melanogaster</i>     | RKAILERRRKGALGKDKGKYTEETAQPMETA    |
| <i>Dictyostelium purpureum</i>     | RKALLERKNRS--SEKCKITKEQV--TAEVN    |
| <i>Tetrahymena thermophila</i>     | RQSLLTRKAAS--LKTCKHTVA-----        |
| <i>Toxoplasma gondii</i>           | RKALLERKRSRA---TTKCKYTEKDV-AMSQVD  |
| <i>Phytophthora sojae</i>          | RKKILERRKNRAVSETEKCKFTEQDV-AMANVD  |
| <i>Plasmodiophora brassicae</i>    | RKQSLERKNRTAQAMQKCKFTEEDV-AMQELD   |
| <i>Emiliana huxleyi</i>            | RRAILERKNAPS--KAKCKYTEQDA-AMQDVD   |
| <i>Trypanosoma brucei</i>          | RKAILERKDRSKTDKSKCKVTAEEK-AMQQMD   |
| <i>Naegleria gruberi</i>           | RKNLLRKRKAETTQANKCKFTEETVKQ-----   |
| <i>Arabidopsis thaliana RPL26A</i> | RKSLLERKAKGAADKEKCKFTEEDV--MQNV    |
| <i>Arabidopsis thaliana RPL26B</i> | RKSLLERKANGAADKEKCKFSAEDV--MENVD   |
| <i>Vitis vinifera</i>              | RKSLLDRKAKGAADKAKCKFTAEDVAALQED    |
| <i>Chlamydomonas reinhardtii</i>   | RKALLERKVAAEKCKCKFTEQDV-AMTNVD     |
| <i>Chlorella sorokiniana</i>       | RQALLRKRAGKGLADKCKFTEAEVAAMENVD    |
| <i>Chondrus crispus</i>            | RKAILDRKNRE--KQDKCKFSEGEVNVMDVD    |
| <i>Guillardia theta</i>            | RKSLLDRKAGDKDKSKCKFSEKDV-AMADVD    |
| <i>Rigifila ramosa</i>             | RKAILDRKNRSTEAKCKCKYSEADVRAMDVE    |
| <i>Plasmodium falciparum</i>       | RKKILDRKAAKEN-----                 |
| <i>Gregarina niphandrodes</i>      | RQAVLDRRHH-----                    |
| <i>Vitrella brassicaeformis</i>    | RKALLDRKNR---ETRCKYDRDVH--MSRVD    |
| <i>Perkinsus marinus</i>           | RKALLERKNRS-KDSGCKRYTDKDV-AMAQVD   |
| <i>Phaeodactylum tricornutum</i>   | RK-----                            |
| <i>Fistulifera solaris</i>         | RKAKLEAKANGKCKSKGGDAT-----MSNV     |
| <i>Ectocarpus siliculosus</i>      | RVALLARKNRSNGGKPAAGAADADV-NMAGVD   |
| <i>Aureococcus anophagefferens</i> | RKTIILGRKDRSKGGAVEG-----ALAGVD     |
| <i>Cafeteria roenbergensis</i>     | RRAILDRRGKD-----S-AMDRVD           |
| <i>Albugo candida</i>              | RKKILERRKNRAVGDKNKSKYTEADV-TMASVD  |
| <i>Albugo laibachii</i>            | RKKILERRKNRAVGDKNKSKYTEADV-AMASVD  |
| <i>Micromonas commoda</i>          | RKALLERKSGG-PEKCKCKFTEDEVKAMQDVD   |
| <i>Cyanidioschyzon merolae</i>     | RIALLKRKERASLMNARVTPSRSAV--MADVD   |
| <i>Ostreococcus lucimarinus</i>    | RKALLARKGAGKGTDA-----              |
| <i>Fonticula alba</i>              | REKLLKVRAGKAKEQTVA-----            |
| <i>Sphaeroforma arctica</i>        | RKAILERKNRDTK-----                 |
| <i>Saccharomyces cerevisiae</i>    | RKALIQRRKGGKLE-----                |
| <i>Endogone sp</i>                 | RKNLLERKDRT---SVKCKNTEVS-----      |
| <i>Candida albicans</i>            | RKALIQRRKGGKAE-----                |
| <i>Neocallimastix californiae</i>  | RKDLLERKAANKQKIPA-----             |
| <i>Piromyces finnis</i>            | RKDLLERKAANKQ-----                 |
| <i>Anaeromyces robustus</i>        | RKDLLERKAANKQLE-----               |
| <i>Entamoeba invadens</i>          | REALLKKRGDAKAYKESVAKKNEQVEEFDKVE   |
| <i>Trichomonas vaginalis</i>       | RKNLIERLGRDQILAKLGHKKQ-----        |
| <i>Spironucleus salmonicida</i>    | RTKKIASKSKKE-----                  |
| <i>Perkinsela sp</i>               | RRRLIERKAKA-----RNAPTADDI-QMKEVD   |

### B

• RPL26 tail lysines

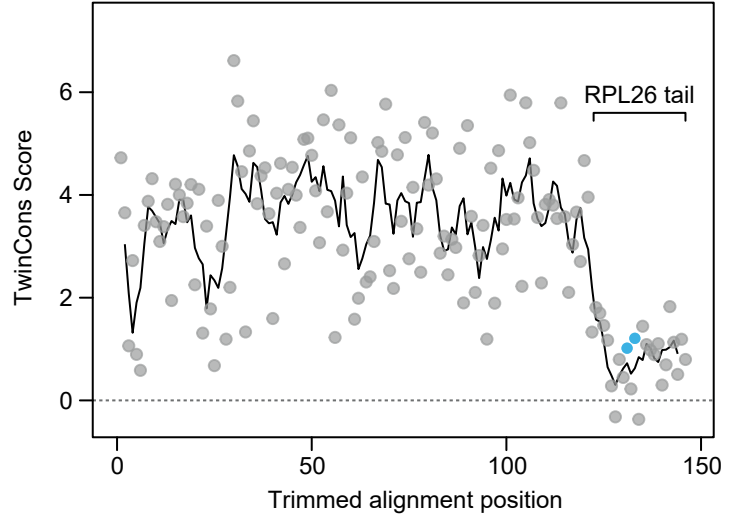

**Appendix Figure S2. Conservation analysis of RPL26 shows that the UFMylated tail region is divergent.**

**(A) Multiple sequence alignment of RPL26 showing the conservation of the C-terminal tail in species with and without UFM1.** Lysine residues that are ufmylated have been highlighted. **(B) TwinCons analysis comparing the sequence conservation of RPL26.** The tail region is highly polymorphic.

# Fig. S3

## A

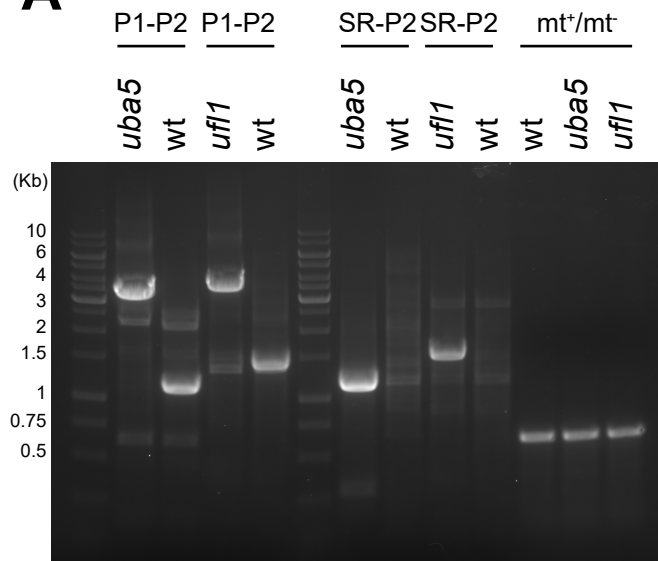

## B

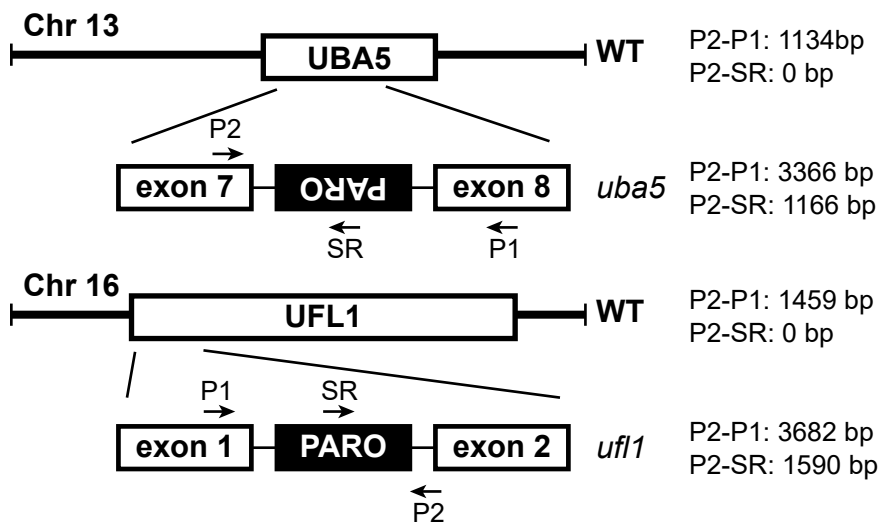

## C

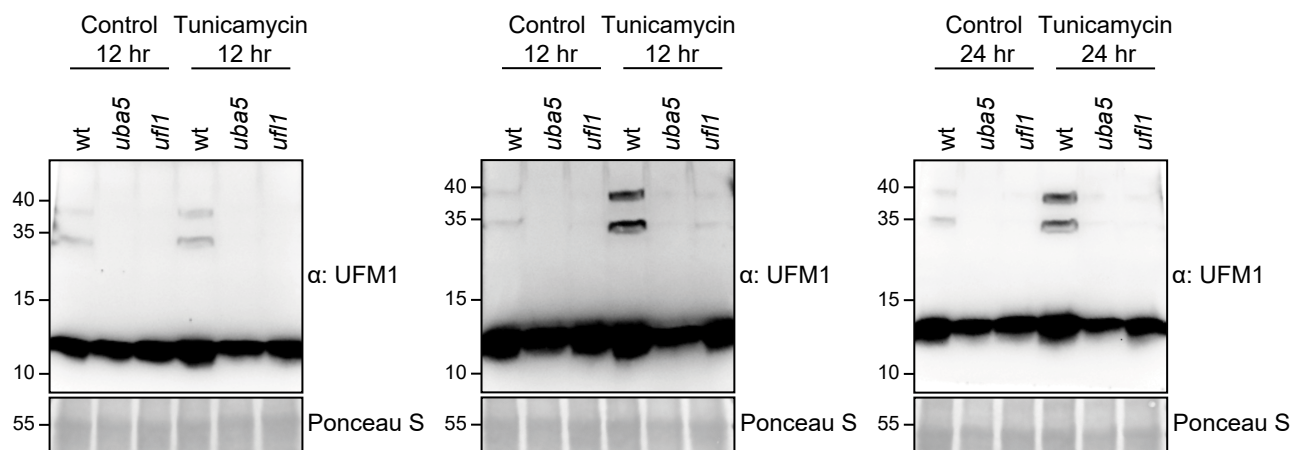

## D

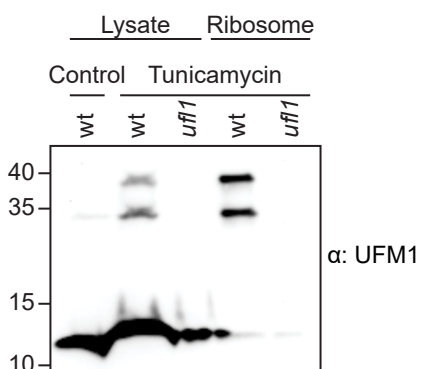

## E

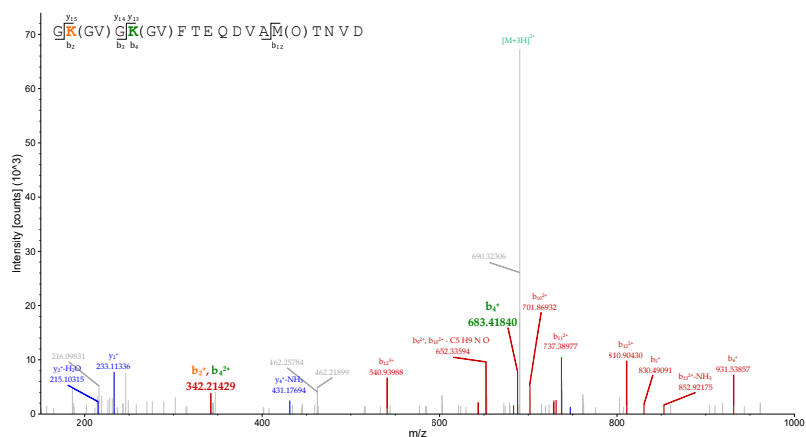

**Appendix Figure S3. Characterization of the *Chlamydomonas reinhardtii* UFMylation pathway mutants.**

**(A) Genotyping of *C. reinhardtii* *uba5* and *ufl1* mutants.** *Left Panel*, mating type (mt +/-) and insertion site PCR products from purified genomic DNA samples prepared from wt, *uba5* and *ufl1* genotypes. PCR products were run on a 1% (w/v) agarose gel. DNA size markers are reported in Kb. **(B) Schematic diagram indicating the insertion site of the mutagenic cassette (PARO) in *ufl1* and *uba5* mutants.** Primers are indicated with arrows and expected PCR products from wild type and mutants are reported next to each respective diagram. **(C) RPL26 mono- and di-UFMylation is lost in *uba5* and *ufl1* mutants.** Cells were either left untreated or treated for 24 hours with 200 ng/mL tunicamycin. Protein extracts were analyzed by immunoblotting with anti-UFM1 antibodies. Total proteins were analyzed by Ponceau S staining. Quantification is shown in Figure 1C. **(D) *C. reinhardtii* (Cr) ribosomes are specifically mono- and di-UFMylated.** Liquid TAP cultures were either left untreated (control) or treated for 24 hours with 200 ng/mL tunicamycin. Protein extracts and purified ribosomes were analyzed by immunoblotting with anti-UFM1 antibodies. **(E) *C. reinhardtii* (Cr) RPL26 is di-UFMylated.** nanoLC-MS/MS spectra of K-GV-containing peptides associated with RPL26. Spectrum, derived from RPL26-(UFM1)<sub>2</sub>, is of a RPL26 peptide containing K-GV remnants on K131 and K133, and oxidation of M141.

**Fig. S4**

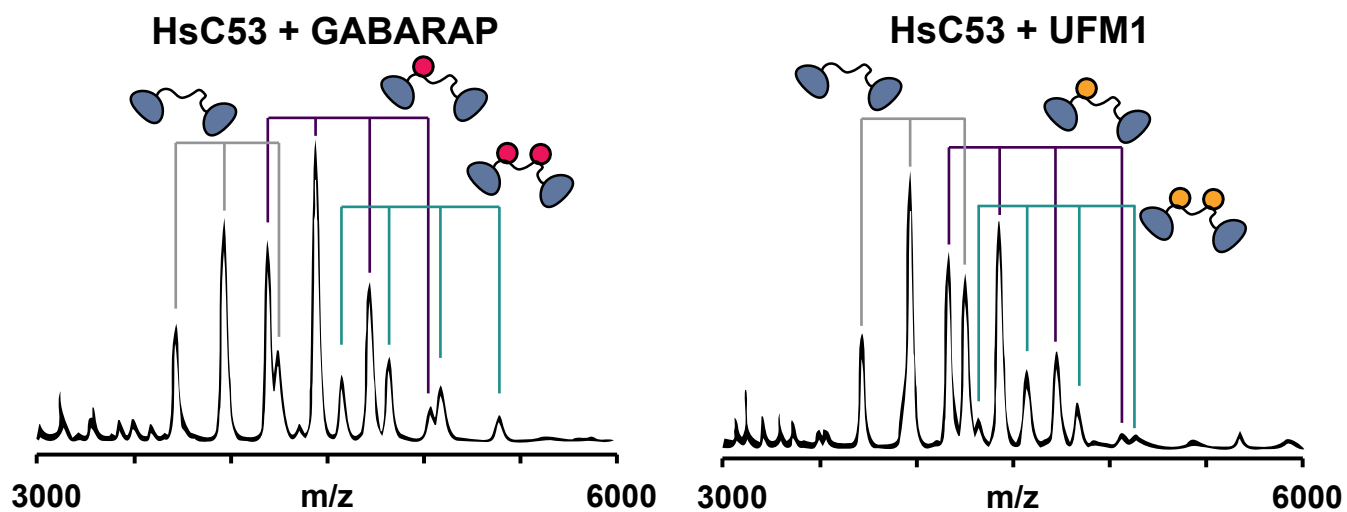



**Appendix Figure S4. Native Mass-Spectrometry (nMS) spectra of HsC53 with GABARAP or HsUFM1 show very similar binding profiles.**

*Left Panel*, GABARAP (4  $\mu\text{M}$ ) and HsC53 (2  $\mu\text{M}$ ). *Right Panel*, HsUFM1 (4  $\mu\text{M}$ ) and HsC53 (2  $\mu\text{M}$ ). Binding of HsC53 to GABARAP and HsUFM1 is observed in 1:1 (violet) and 1:2 ratios (teal).

# Fig. S5

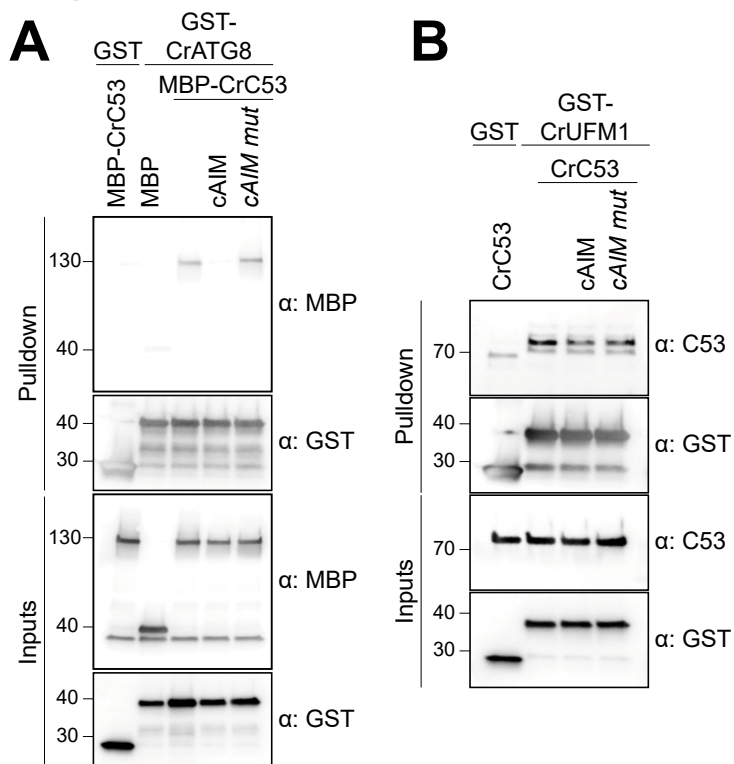

**Appendix Figure S5. The canonical ATG8 Interacting Motif (cAIM) peptide cannot outcompete C53-UFM1 interaction for *C. reinhardtii* (Cr) protein orthologs.**

**(A) CrC53 binds CrATG8A in a cAIM-dependent manner. (B) CrC53 binds UFM1 in a cAIM-independent manner.** Bacterial lysates containing recombinant protein or purified recombinant proteins were mixed and pulled down with glutathione magnetic agarose beads. Input and bound proteins were visualized by immunoblotting with anti-GST, anti-MBP or anti-AtC53 antibodies. cAIM wild type or mutant peptides were used to a final concentration of 200  $\mu$ M.

# Fig. S6

## A

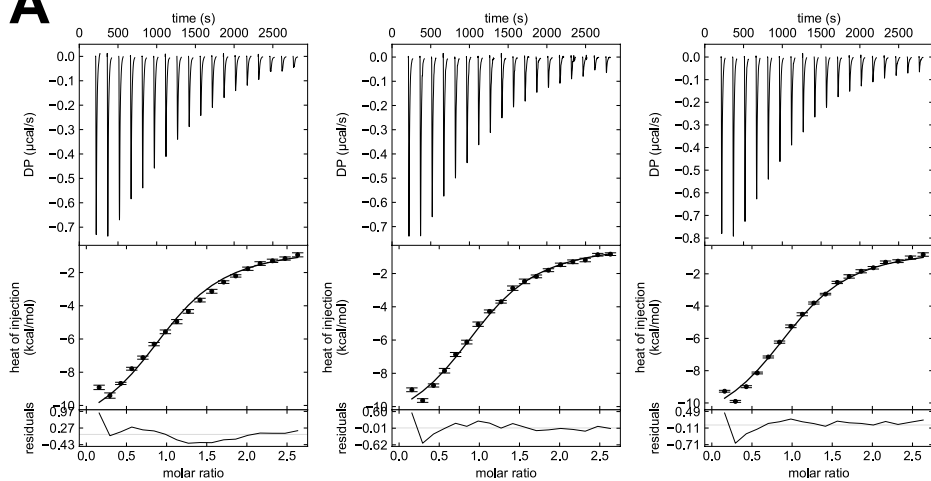

|            | Best-fit value | 68.3% Confidence interval |
|------------|----------------|---------------------------|
| $K_D$      | 7.51           | 5.30, 10.97               |
| $\Delta H$ | -11.98         | -14.31, -10.40            |

## B

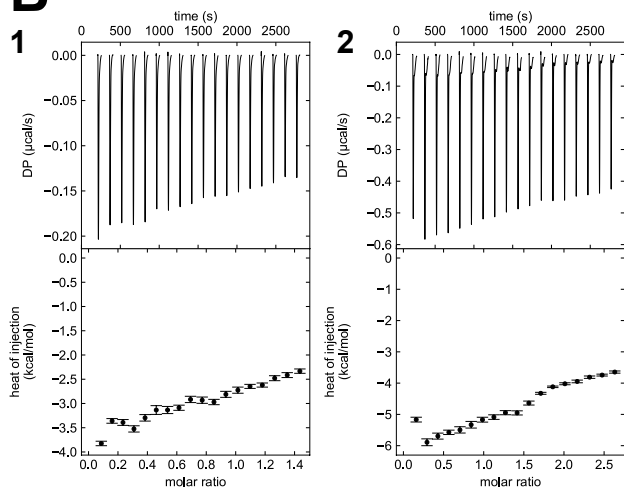

**Appendix Figure S6. Titrations of HsUFM1 with UBA5 LIR peptide and HsC53<sup>wt</sup>.**

**(A) Titrations of HsUFM1 with UBA5 LIR.** The concentrations of reactants are 40  $\mu\text{M}$  for UFM1 (in cell) and 550  $\mu\text{M}$  UBA5 LIR (in syringe). **(B) Titrations of HsUFM1 with HsC53<sup>wt</sup>** The concentrations of reactants are 40  $\mu\text{M}$  for UFM1 (in cell) and 300  $\mu\text{M}$  (1) or 550  $\mu\text{M}$  HsC53<sup>wt</sup> (in syringe) (2). Global analysis was performed using a hetero-association model A + B. The top panels show the SVD reconstructed thermograms, the middle panel shows the isotherms, and the bottom panel shows the residuals. Extracted global parameters and their 68.3% confidence interval are reported in the respective tables. Thermograms were reconstructed with NITPIC, global analysis was done in SEDPHAT, and data visualization was plotted in GUSI. The dissociation constant ( $K_D$ ) is reported  $\mu\text{M}$  units, while the enthalpy ( $\Delta H$ ) is reported in kcal/mol units.

**Fig. S7****A**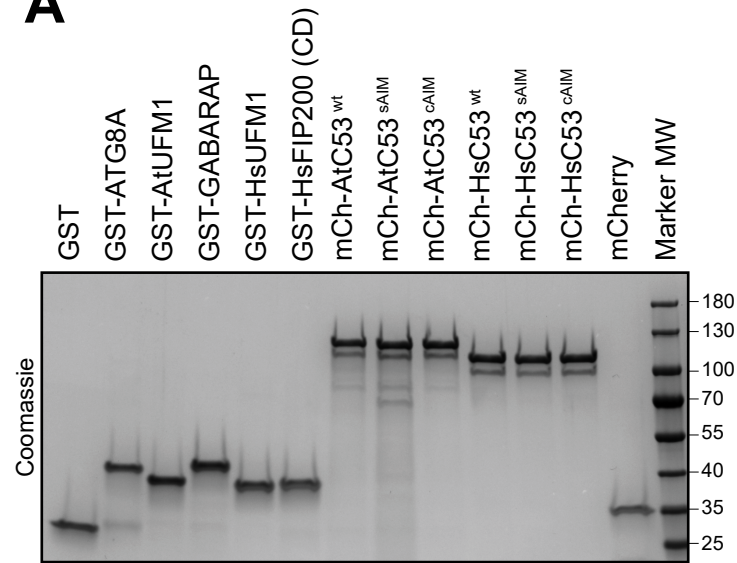**B**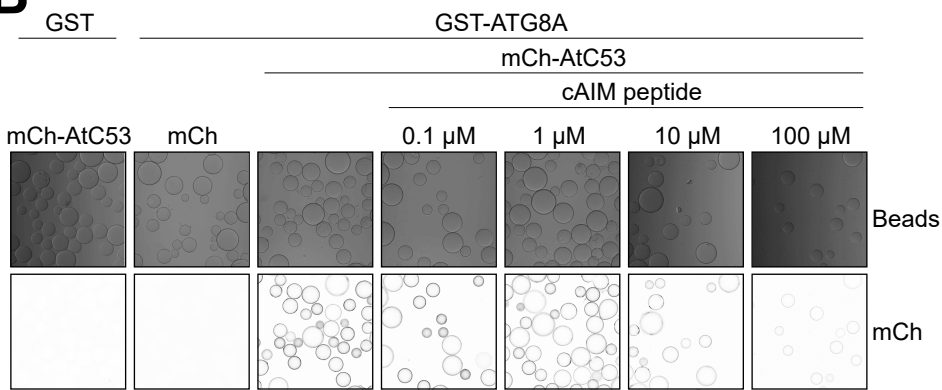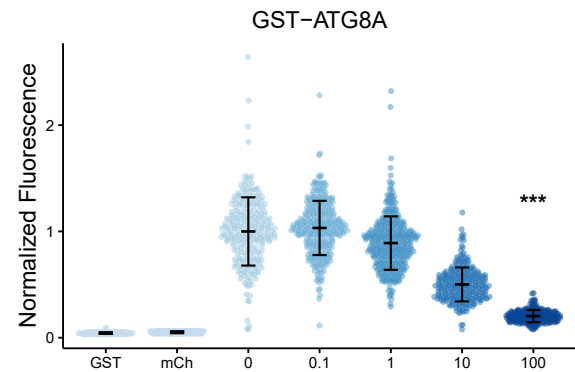**C**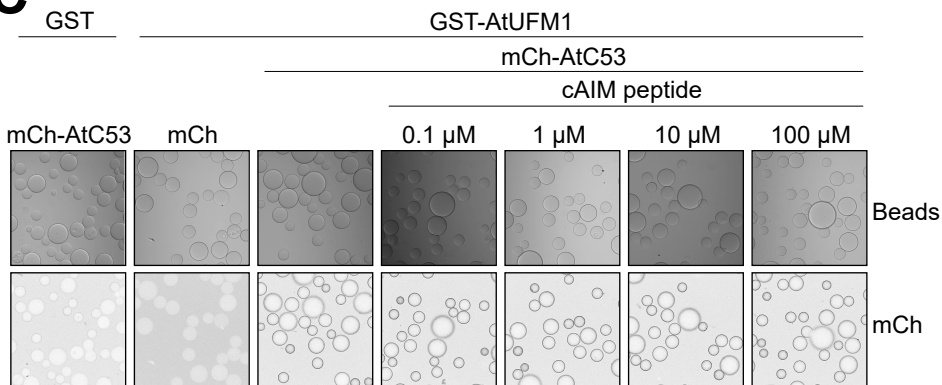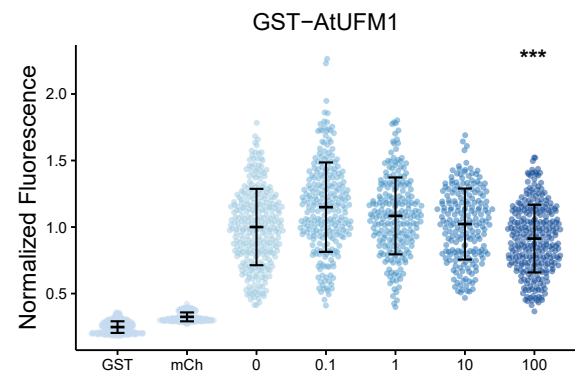**D**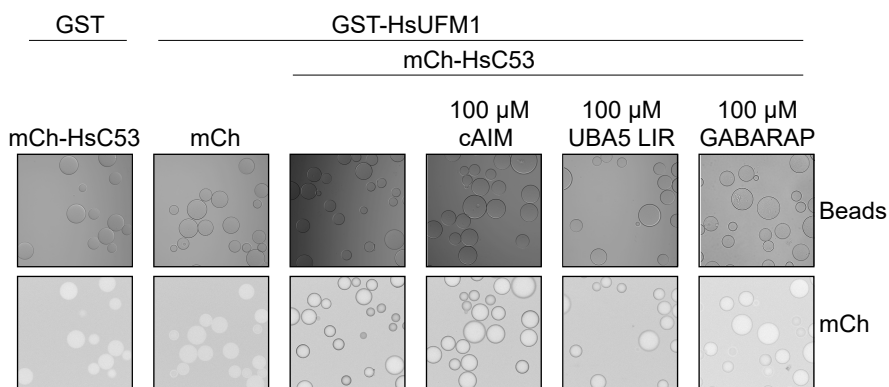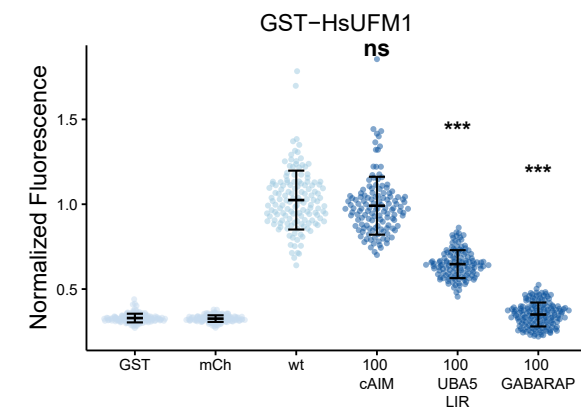

**Appendix Figure S7. The canonical ATG8 Interacting Motif (cAIM) cannot outcompete C53-UFM1 interaction.**

**(A) Purified proteins used for the protein-protein interaction microscopy binding assays.** Recombinant proteins were analyzed for purity by SDS-PAGE followed by Coomassie staining. Marker molecular weights (MW) are indicated in kDa. mCh: mCherry.

**(B, C) Microscopy-based protein-protein interaction assays showing unlike ATG8A-C53 interaction, UFM1-C53 interaction is insensitive to cAIM peptide competition.** Glutathione-sepharose beads were prepared by incubating them with GST-ATG8A (C) or GST-AtUFM1 (D). The pre-assembled beads were then washed and mixed with 1  $\mu$ M of AtC53 containing increasing concentrations of cAIM peptide (0-100  $\mu$ M). The beads were then imaged using a confocal microscope. *Left Panel*, representative confocal images (inverted grayscale) for each condition are shown. *Right panel*, normalized fluorescence is shown for each condition with the mean ( $\pm$  SD) of 2 independent replicates containing 2 technical replicates. Unpaired two-samples Wilcoxon test with continuity correction was performed to analyze the differences between wild type without cAIM peptide and wild type with 100  $\mu$ M cAIM peptide. \*\*\*, p-value < 0.001. Total number of beads, mean, median, standard deviation and p-values are reported in Supplementary data S1.

**(D) Microscopy-based protein-protein interaction assays showing UBA5 LIR peptide and GABARAP can compete for C53 interaction with UFM1.** Glutathione-sepharose beads were prepared by incubating them with GST-HsUFM1. The pre-assembled beads were then washed and mixed with 1  $\mu$ M of HsC53 with either 100  $\mu$ M cAIM peptide, 100  $\mu$ M UBA5 LIR peptide or 100  $\mu$ M GABARAP. The beads were then imaged using a confocal microscope. *Left Panel*, representative confocal images (inverted grayscale) for each condition are shown. *Right panel*, normalized fluorescence is shown for each condition with the mean ( $\pm$  SD). Unpaired two-samples Wilcoxon test with continuity correction was performed to analyze the differences between wild type and wild type mixed with either cAIM peptide, UBA5 LIR peptide or GABARAP. ns, p-value > 0.05, \*\*\*, p-value < 0.001. Total number of beads, mean, median, standard deviation and p-values are reported in Supplementary data S1.

**Fig. S8**

**A**

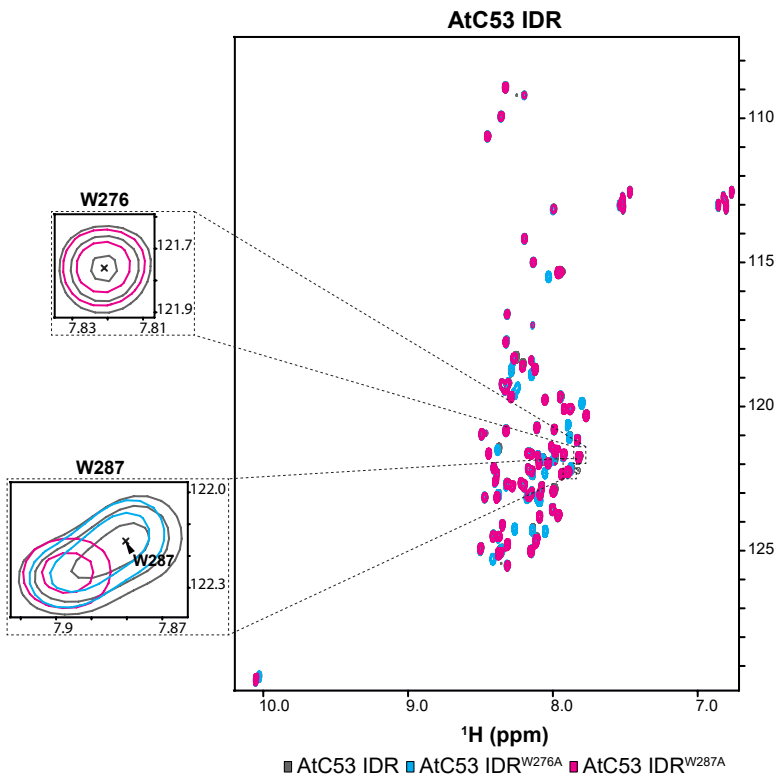

**B**

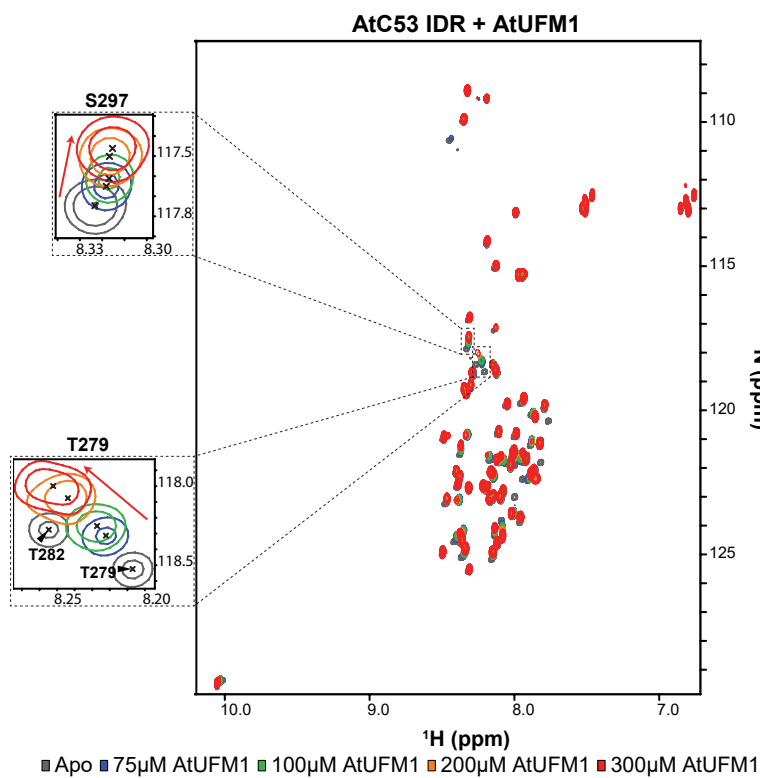

**C**

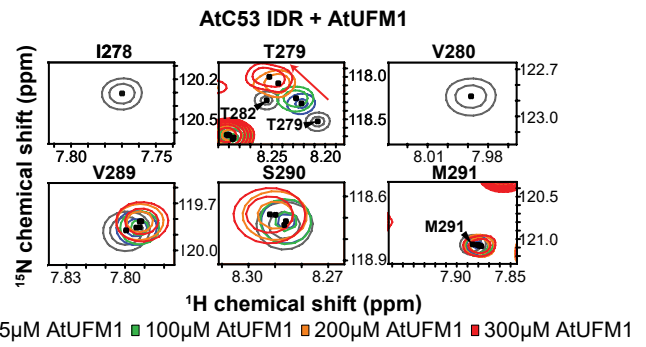

**D**

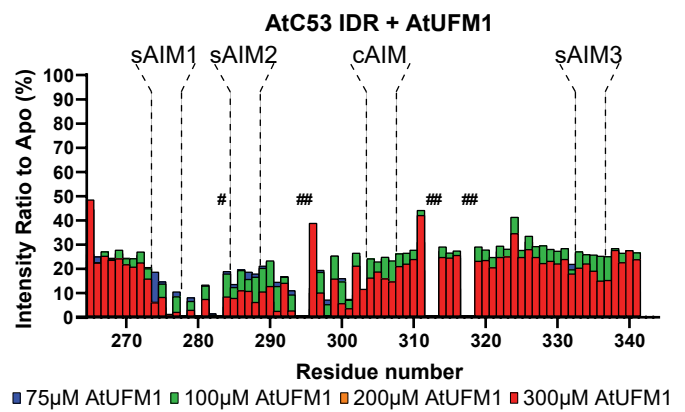

**E**

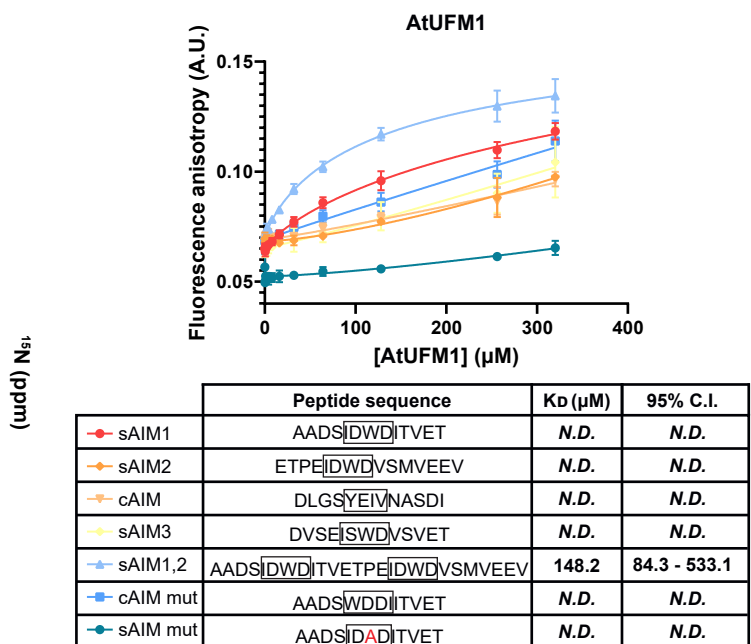



**Appendix Figure S8. Structural characterization of AtC53 IDR binding to AtUFM1 using NMR spectroscopy.**

**(A) Validation of AtC53 IDR backbone resonance assignments.** Overlaid  $^1\text{H}$ - $^{15}\text{N}$  HSQC spectra of 100  $\mu\text{M}$  isotope-labelled AtC53 IDR (grey), AtC53 IDR<sup>W276A</sup> (cyan) and AtC53 IDR<sup>W287A</sup> (magenta). Insets of resonances corresponding to residues W276 and W287 are shown. **(B) Addition of AtUFM1 changes the magnetic resonance of specific residues in AtC53.** Overlaid  $^1\text{H}$ - $^{15}\text{N}$  HSQC spectra of isotope-labelled AtC53 IDR (100  $\mu\text{M}$ ) in their free (gray) or bound state to 75  $\mu\text{M}$  (blue), 100  $\mu\text{M}$  (green), 200  $\mu\text{M}$  (orange) and 300  $\mu\text{M}$  (red) unlabelled AtUFM1. Examples of individual peaks that shift upon binding are shown as insets. Chemical shifts are indicated with arrows. **(C) Residues downstream AtC53 sAIM1 but not sAIM2 contribute to AtUFM1 binding.** Insets of overlaid  $^1\text{H}$ - $^{15}\text{N}$  HSQC spectra of isotope-labelled AtC53 IDR (100  $\mu\text{M}$ ) showing chemical shift perturbations of individual peaks from backbone amides of AIM residues in their free (gray) or bound state to 75  $\mu\text{M}$  (blue), 100  $\mu\text{M}$  (green), 200  $\mu\text{M}$  (orange) and 300  $\mu\text{M}$  (red) unlabelled AtUFM1. Chemical shifts are indicated with arrows. **(D) Signal intensity changes in AtC53 IDR upon binding of AtUFM1 are concentration dependent.** Intensity ratio broadening of AtC53 IDR (100  $\mu\text{M}$ ) in the presence of 75  $\mu\text{M}$  (blue), 100  $\mu\text{M}$  (green), 200  $\mu\text{M}$  (orange) and 300  $\mu\text{M}$  (red) AtUFM1. Bars corresponding to residues in AIMS are highlighted. Unassigned AtC53 IDR residues are indicated by hashtags. **(E) A peptide spanning C53 sAIM1 and sAIM2 binds UFM1.** Fluorescence anisotropy (FA) assay using AtC53 IDR-derived peptides as a probe for AtUFM1 binding. Error bars represent the FA values expressed in arbitrary units (A.U.) as mean  $\pm$  s.d. of triplicate experiments using the same buffer and protein conditions. Peptide sequences are listed, sAIMs are highlighted. N.D. not determined.

**Fig. S9**

**A**

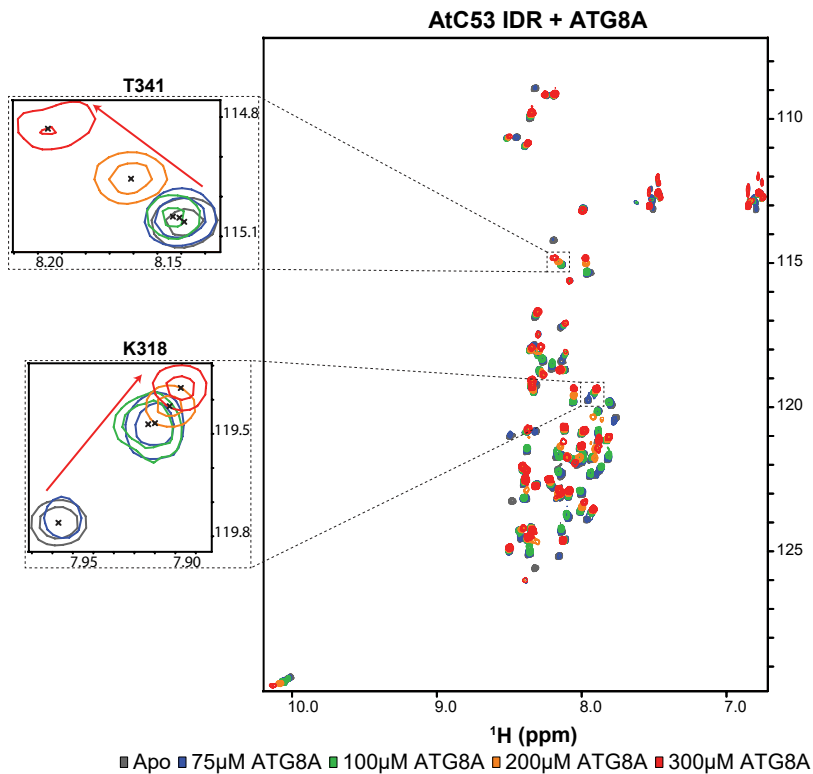

**B**

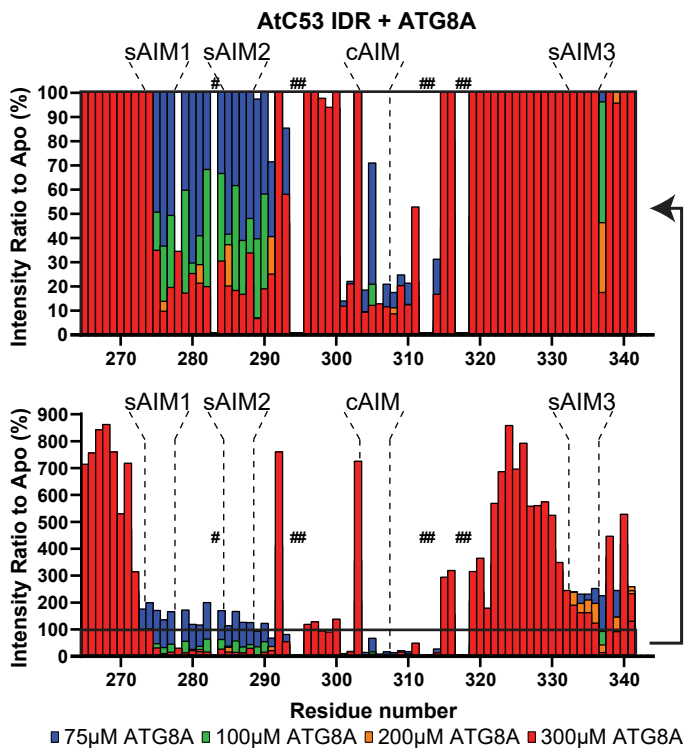

**C**

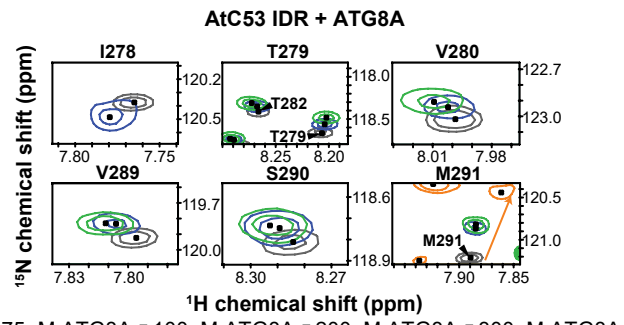

**D**

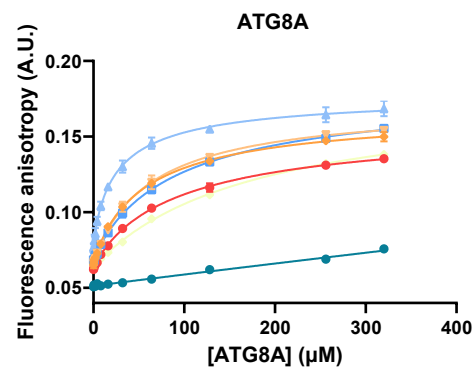

|            | Peptide sequence            | Kd (μM) | 95% C.I.      |
|------------|-----------------------------|---------|---------------|
| ● sAIM1    | AADS[DWD]IVET               | 97.59   | 77.91 - 133.0 |
| ● sAIM2    | ETPE[DWD]VSMVEEV            | 56.82   | 50.14 - 66.01 |
| ● cAIM     | DLGSYEIVNASDI               | 62.47   | 53.80 - 75.25 |
| ● sAIM3    | DVSE[SWD]VSVET              | 176.5   | 137.6 - 249.7 |
| ● sAIM1,2  | AADS[DWD]IVETPE[DWD]VSMVEEV | 26.54   | 21.81 - 33.87 |
| ● cAIM mut | AADS[WDD]IVET               | 94.27   | 77.47 - 122.2 |
| ● sAIM mut | AADS[DA]IVET                | N.D.    | N.D.          |

**Appendix Figure S9. Structural characterization of AtC53 IDR binding to ATG8A using NMR spectroscopy.**

**(A) Addition of ATG8A affects a greater number of residues in the AtC53 IDR spectra.** Overlaid  $^1\text{H}$ - $^{15}\text{N}$  HSQC spectra of isotope-labelled AtC53 IDR (100  $\mu\text{M}$ ) in their free (gray) or bound state to 75  $\mu\text{M}$  (blue), 100  $\mu\text{M}$  (green), 200  $\mu\text{M}$  (orange) and 300  $\mu\text{M}$  (red) unlabelled ATG8A. Insets of individual peaks that shifted upon binding are shown. Chemical shifts are indicated with arrows. **(B) Signal intensity changes in AtC53 IDR upon binding of ATG8A are concentration dependent.** Intensity ratio broadening of AtC53 IDR (100  $\mu\text{M}$ ) in the presence of 75  $\mu\text{M}$  (blue), 100  $\mu\text{M}$  (green), 200  $\mu\text{M}$  (orange) and 300  $\mu\text{M}$  (red) ATG8A. Top panel represents an inset of lower panel. Unassigned AtC53 IDR residues are indicated by hashtags. Bars corresponding to residues in AIMs are highlighted. Top panel represents an inset of lower panel. **(C) Residues downstream AtC53 sAIM1 and sAIM2 contribute to ATG8A binding.** Insets of overlaid  $^1\text{H}$ - $^{15}\text{N}$  HSQC spectra of isotope-labelled AtC53 IDR (100  $\mu\text{M}$ ) showing chemical shift perturbations of individual peaks from backbone amides of AIM residues in their free (gray) or bound state to 75  $\mu\text{M}$  (blue), 100  $\mu\text{M}$  (green), 200  $\mu\text{M}$  (orange) and 300  $\mu\text{M}$  (red) unlabelled ATG8A. Chemical shifts are indicated with arrows. **(D) A peptide spanning C53 sAIM1 and sAIM2 binds ATG8A.** Fluorescence anisotropy (FA) assay using AtC53 IDR-derived peptides as a probe for ATG8A binding. Error bars represent the FA values expressed in arbitrary units (A.U.) as mean  $\pm$  s.d. of triplicate experiments using the same buffer and protein conditions. Peptide sequences are listed, sAIMs are highlighted. N.D. not determined.

**Fig. S10**

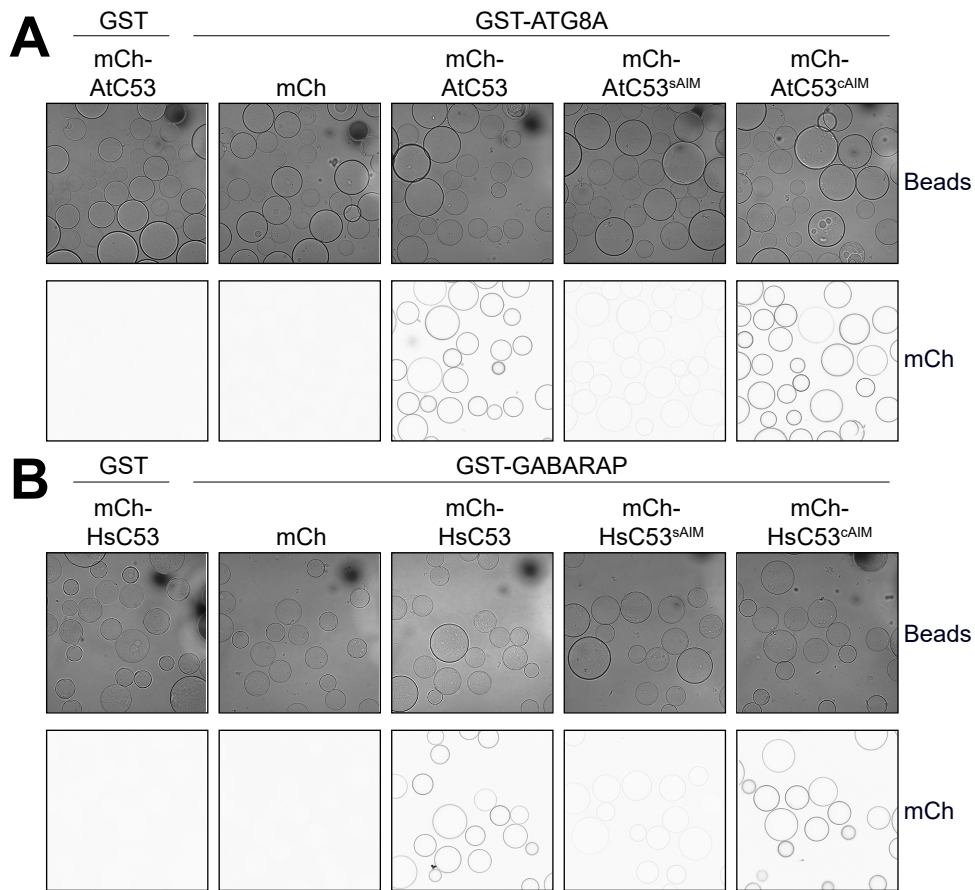

**Appendix Figure S10. Microscopy-based protein–protein interaction assays showing C53<sup>cAIM</sup> has increased affinity towards ATG8 or GABARAP.**

**(A, B)** Representative confocal images (inverted grayscale) for each condition from Figure 5 D, E are shown.

# Fig. S11

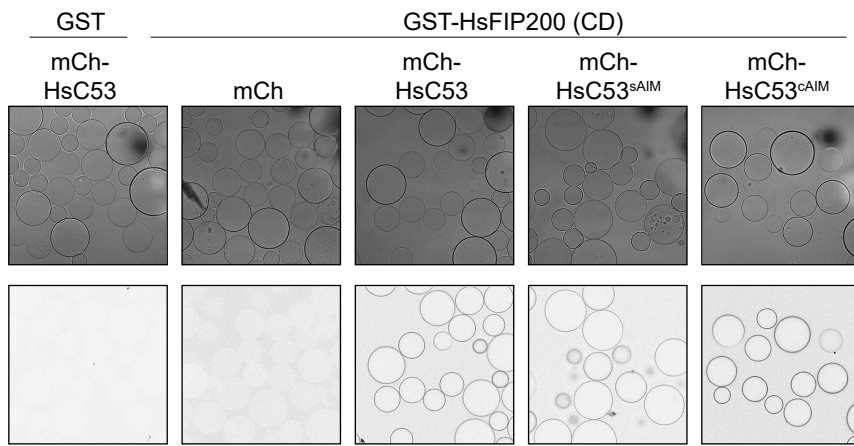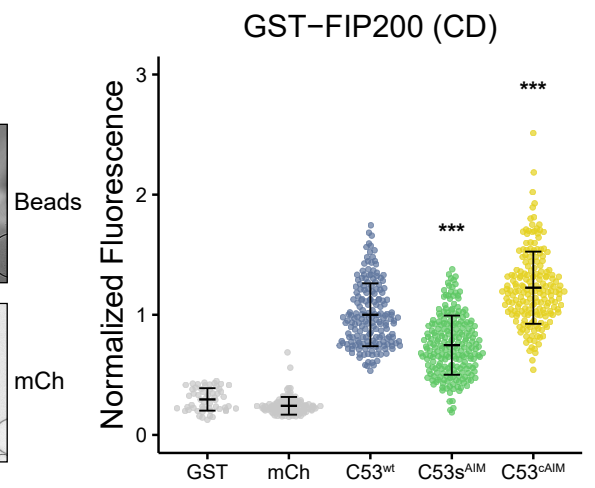

**Appendix Fig. S11. C53-HsFIP200 Claw domain (CD) interaction is also mediated by the sAIM sequences and strengthened by sAIM to cAIM conversion.**

Glutathione-sepharose beads were prepared by incubating them with GST-FIP200 CD. The pre-assembled beads were then washed and mixed with 1  $\mu$ M of HsC53, 1  $\mu$ M of HsC53<sup>sAIM</sup> or 1  $\mu$ M of HsC53<sup>cAIM</sup> mutants. The beads were then imaged using a confocal microscope. *Left Panel*, representative confocal images (inverted grayscale) for each condition are shown. *Right panel*, normalized fluorescence is shown for each condition with the mean ( $\pm$  SD) of 2 independent replicates containing 2 technical replicates. Unpaired two-samples Wilcoxon test with continuity correction was performed to analyze the differences between wild type and mutants. \*\*\*, p-value < 0.001. Total number of beads, mean, median, standard deviation and p-values are reported in Supplementary data S1.

# Fig. S12

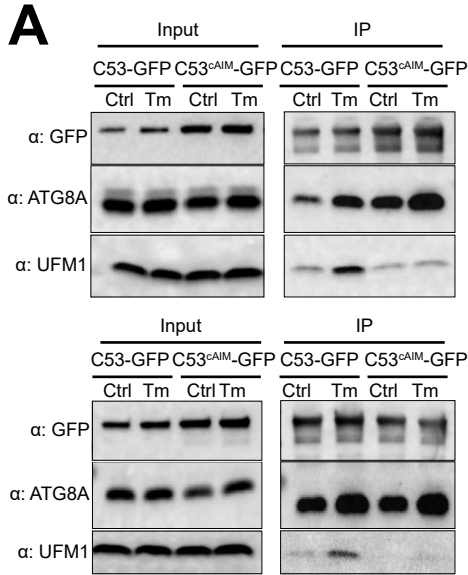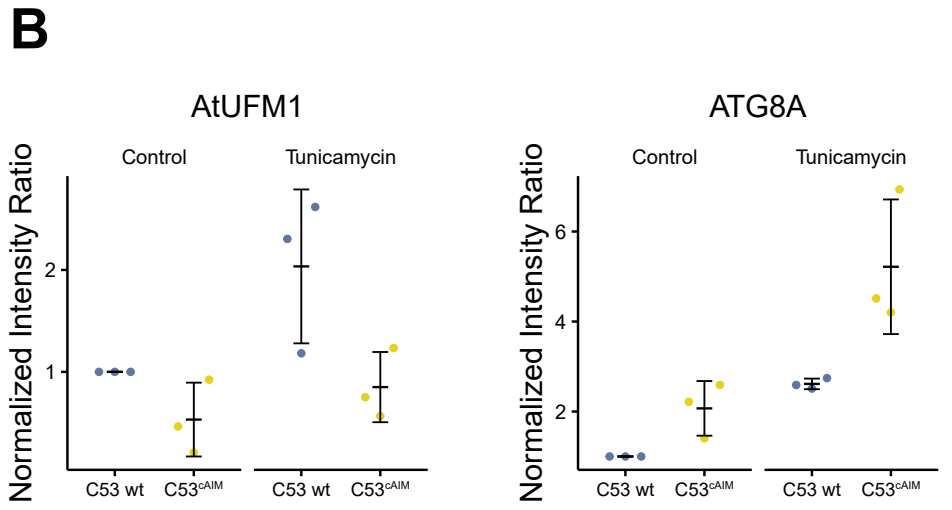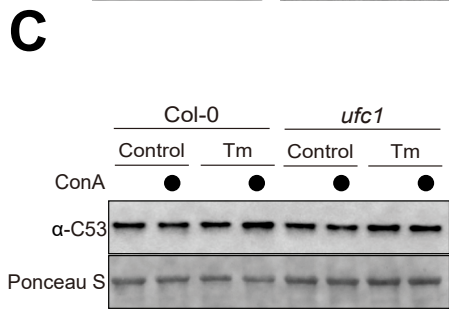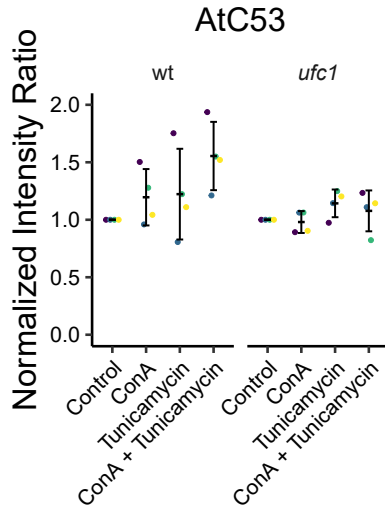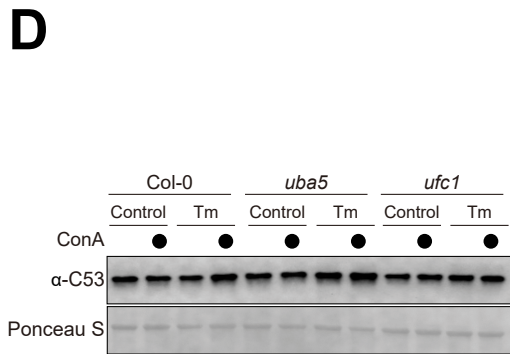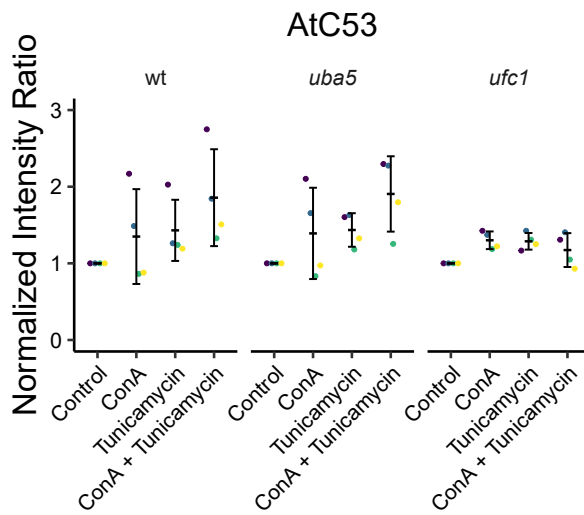



**Appendix Figure S12. *In vivo* pull downs showing sAIM to cAIM conversion strengthens C53-ATG8 association while weakens C53-UFM1 association.**

**(A) Biological replicates of representative experiment shown in Figure 5F.** 6-day old *Arabidopsis* seedlings expressing AtC53-GFP, AtC53<sup>cAIM</sup>-GFP in *c53* mutant background were incubated in liquid 1/2 MS medium with 1% sucrose supplemented with DMSO as control (Ctrl) or 10  $\mu$ g/ml tunicamycin (Tm) for 16 hours and used for co-immunoprecipitation. Lysates were incubated with GFP-Trap Magnetic Agarose, input and bound proteins were detected by immunoblotting using the respective antibodies as indicated. **(B) Quantification of blots in (Fig. 5F, Fig. S12A).** UFM1 and ATG8 protein levels that associate with AtC53-GFP or AtC53<sup>cAIM</sup>-GFP are shown. Bars represent the mean ( $\pm$  SD) of 3 biological replicates (BR). **(C, D) Autophagic flux analysis of endogenous C53 protein using AtC53 antibody.** Western blot analysis of Col-0, *uba5* and *ufc1* *Arabidopsis* seedlings incubated in either control, or 10  $\mu$ g/ml tunicamycin for 16 hrs. In addition, each treatment was supplemented with or without 1  $\mu$ m concanamycin A (conA) as indicated to visualize vacuolar degradation. *Right panel*, quantification of the relative intensities of the protein bands were normalized for the total protein level of the lysate, relative protein intensity in the non-Tm and non-ConA treated control is set as 1 for each genotype. Average C53 levels and SD for n = 4 are shown.

**Supplementary Data S1.** Total number of beads, mean, median, standard deviation and p-values of the microscopy-based protein-protein interaction assays are reported.

**Supplementary Data S2.** Fiji macro and agarose bead model for automatic quantification.
