# Supplementary material for: Shuffled ATG8 interacting motifs form an ancestral bridge between UFMylation and autophagy
Source: PubMed Central journal article supplement (PMC10183829; doi:10.15252/embj.2022112053), 2023-02-10
Supplement: EMBJ-42-e112053-s005.pdf [file EMBJ-42-e112053-s005.pdf]

## Expanded View Figures

**Figure EV1. Expanded version of the tree depicted in Fig 1A, displaying the presence and absence of UFMylation proteins across the eukaryotic taxa.**

A-I The tree has been divided into eukaryotic supergroups including the Opisthokonta (A), Amoebozoa (B), Haptophyta and SAR (C), Archaeplastida (D), Discoba (E), Metamonada (F), CRuMs (G) and Apusozoa (H). (I) Pairwise binary Phi correlation of UFMylation proteins distributions.

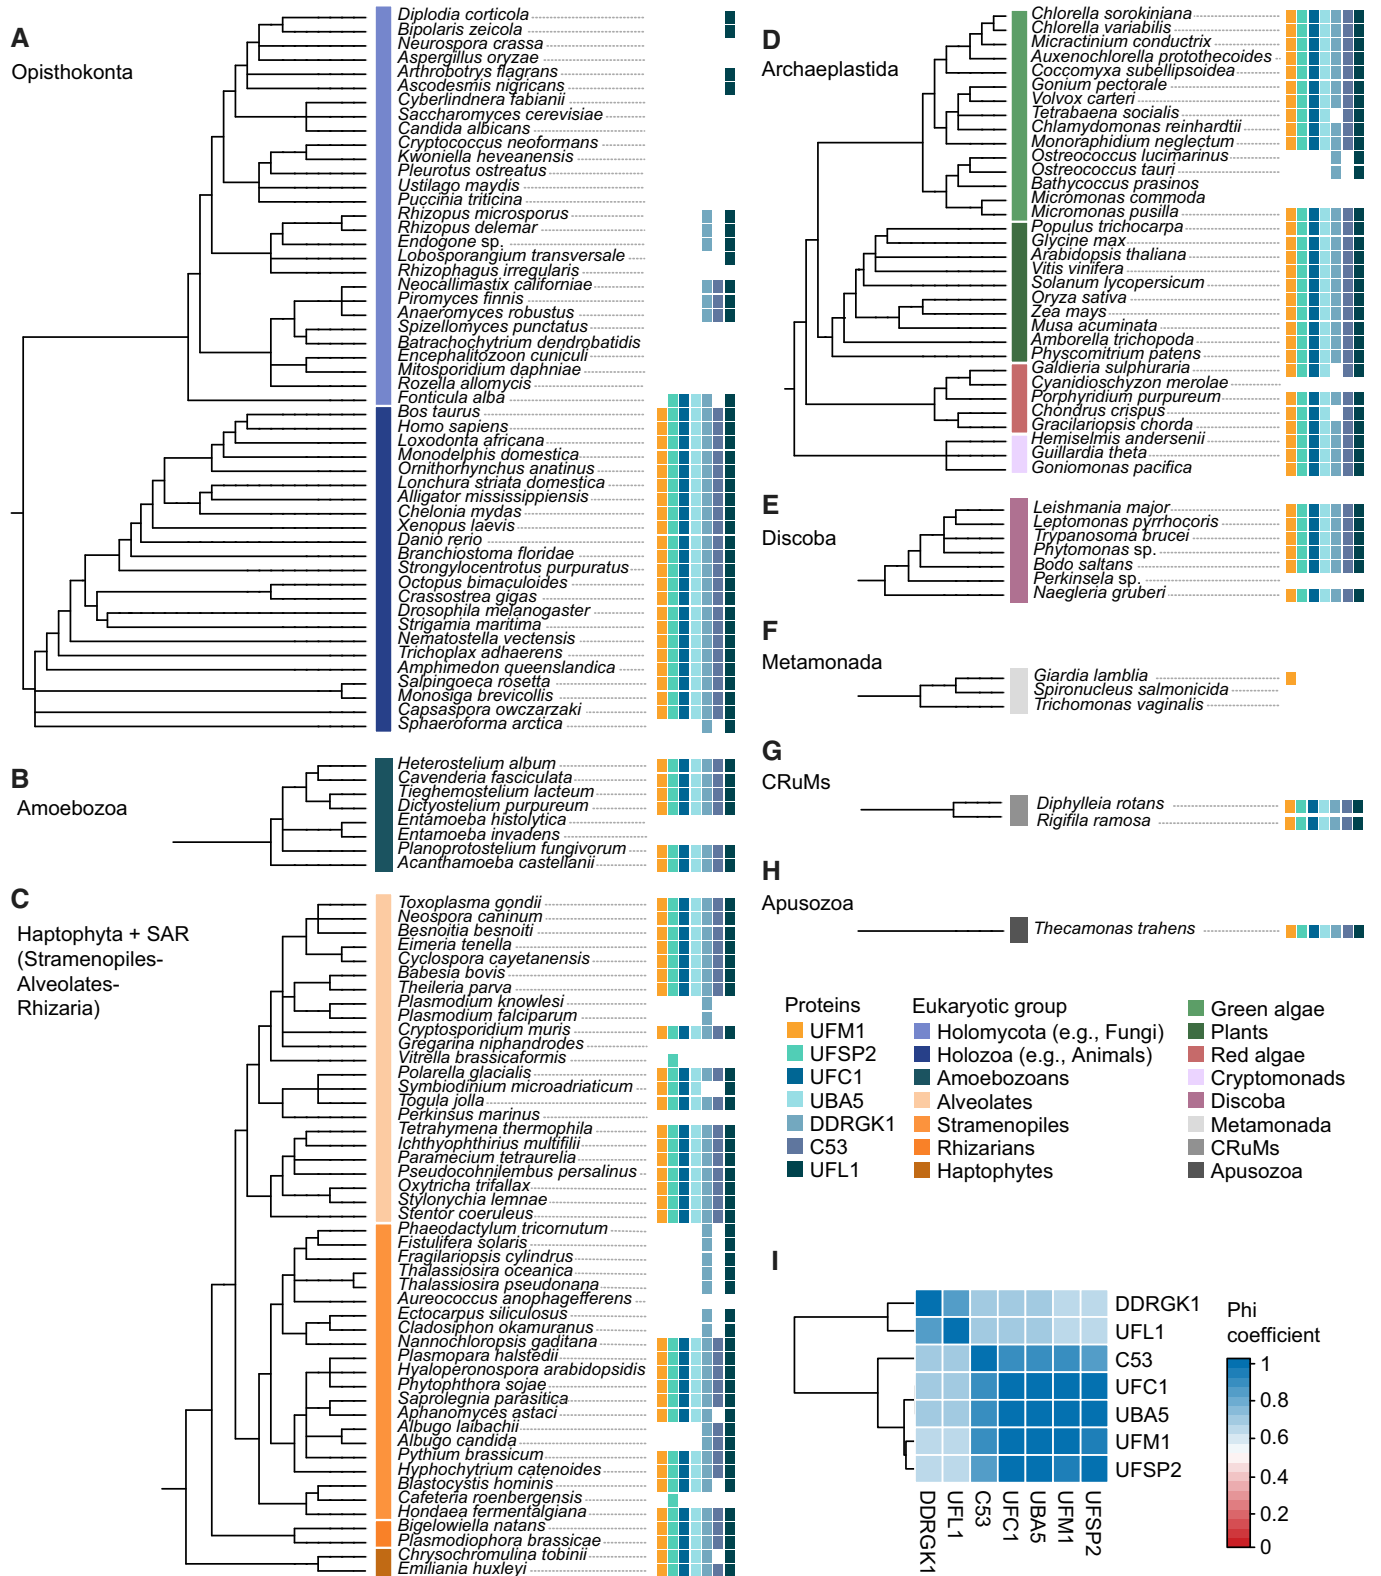

Figure EV1.

**Figure EV2. C53 orthologous from two TSAR representatives as well as representatives from Haptista, Cryptista, Diplomonada, Amoebozoa, and CRuMs interact with human and Arabidopsis ATG8 and UFM1.**

Bacterial lysates containing recombinant protein were mixed and pulled down with glutathione magnetic agarose beads. Input and bound proteins were visualized by immunoblotting with anti-GST and anti-MBP antibodies. *Tetrahymena thermophila* (Tt), *Dictyostelium purpureum* (Dp), *Emiliana huxleyi* (Eh), *Guillardia theta* (Gt), *Trypanosoma brucei* (Tb), *Rigifila ramosa* (Rr) and *Phytophthora sojae* (Ps).

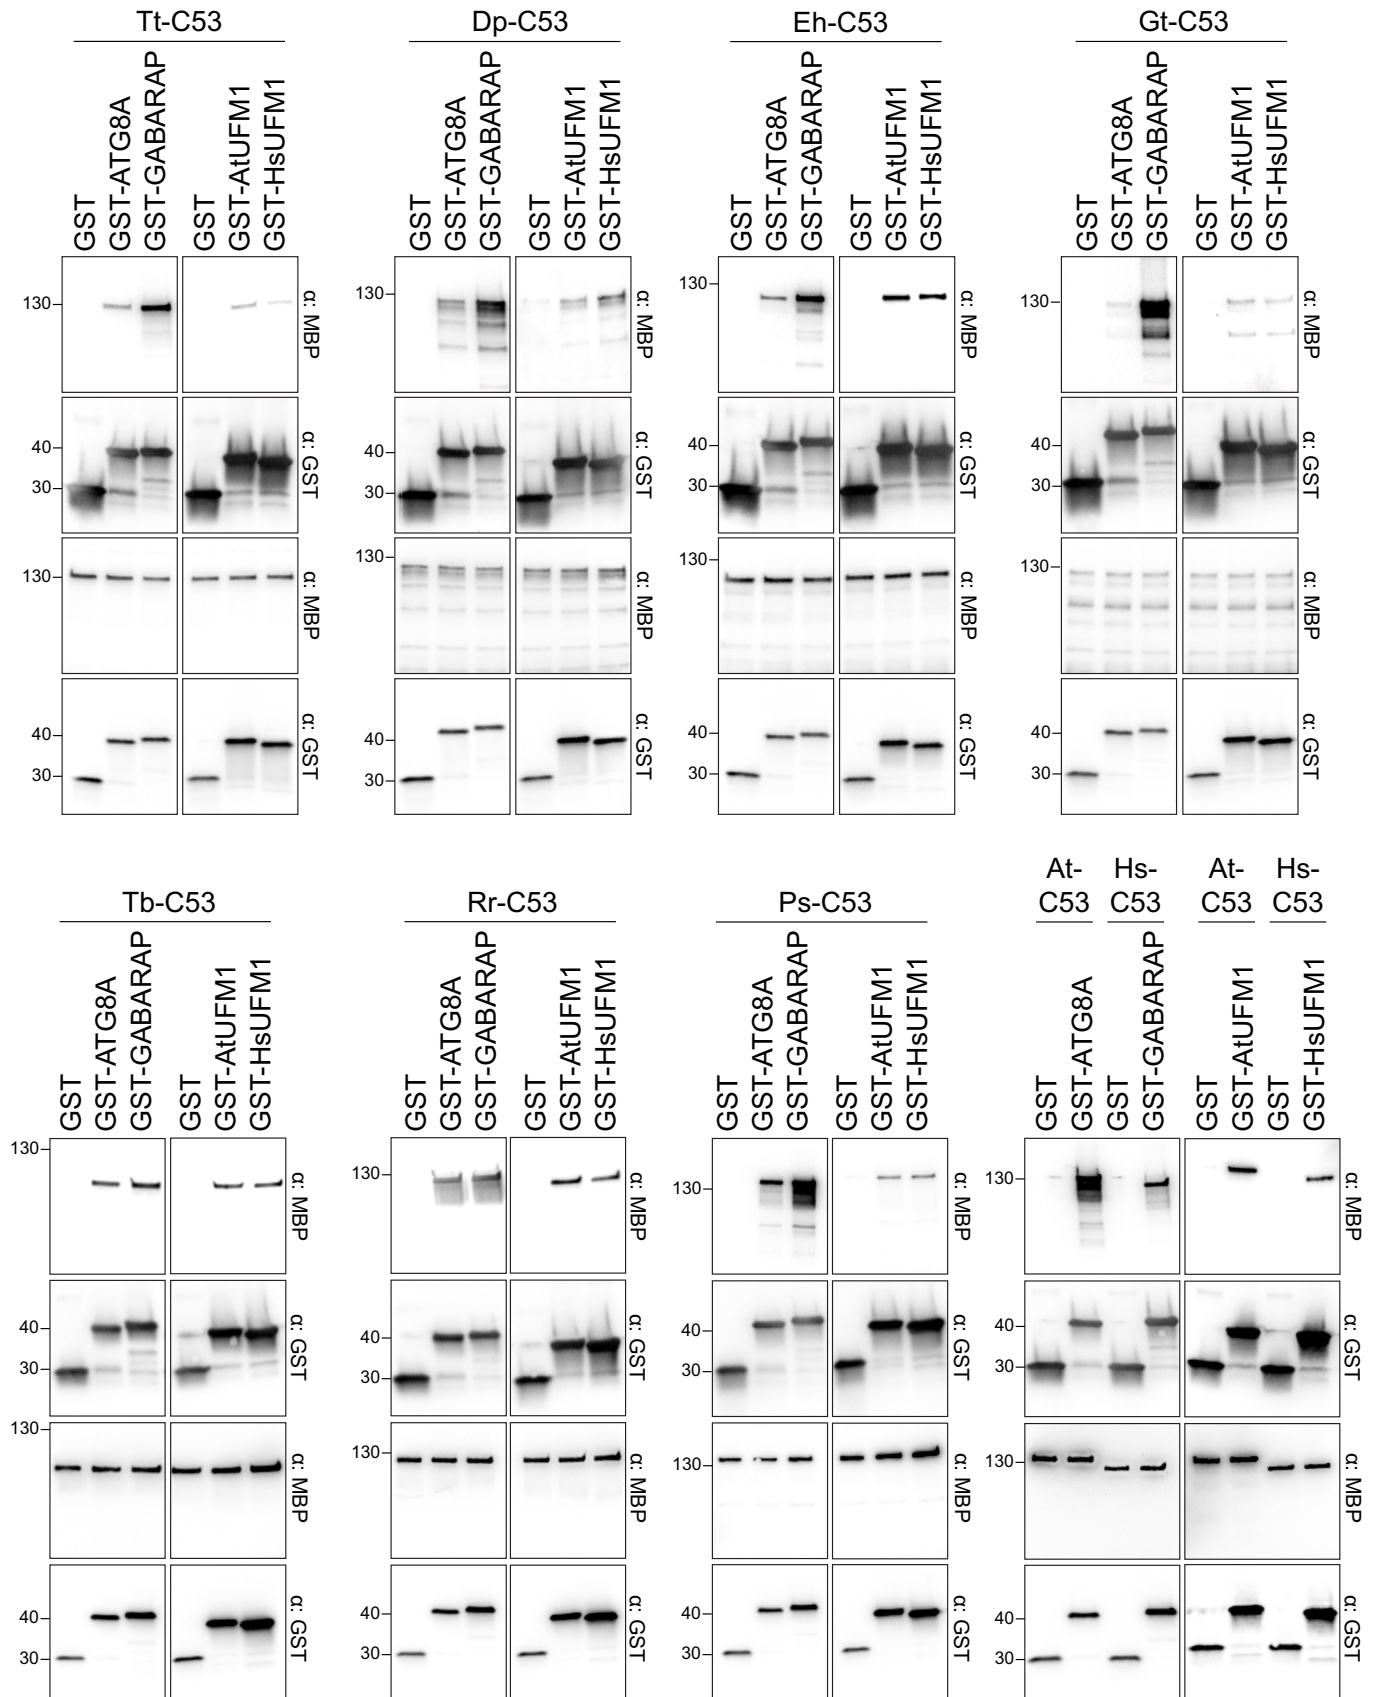

Figure EV2.

**Figure EV3. Structural characterization of UFM1 binding to C53 IDR using NMR spectroscopy.**

- A A small number of residues are affected by the addition of HsC53 IDR as shown in the HsUFM1 spectra. Overlaid  $^1\text{H}$ - $^{15}\text{N}$  HSQC spectra of isotope-labeled HsUFM1 (100  $\mu\text{M}$ ) in their free (gray) or bound state to 75  $\mu\text{M}$  (blue), 100  $\mu\text{M}$  (green), 200  $\mu\text{M}$  (orange) and 300  $\mu\text{M}$  (red) unlabeled HsC53 IDR. Insets of individual peaks that shift upon binding are shown.
- B HsC53 IDR binding to HsUFM1 causes general signal intensity drop in HsUFM1 spectra. Intensity ratio broadening of HsUFM1 (100  $\mu\text{M}$ ) in the presence of 75  $\mu\text{M}$  (blue), 100  $\mu\text{M}$  (green), 200  $\mu\text{M}$  (orange) and 300  $\mu\text{M}$  (red) HsC53 IDR.
- C Chemical shift perturbations (CSPs) in the HsUFM1 spectrum (gray) upon addition of 75  $\mu\text{M}$  (blue), 100  $\mu\text{M}$  (green), 200  $\mu\text{M}$  (orange) and 300  $\mu\text{M}$  (red) HsC53 IDR. The dashed line represents SD.
- D Three-dimensional mapping of residues showing CSP in HsUFM1 NMR spectra upon HsC53 IDR binding. CSPs were mapped on the UFM1 structure (PDB: 1WXS) presented schematically on the left plot and as a surface representation in two projections on the right plot. Residues that are not affected or are slightly ( $\text{CSP} < 0.025$ ), intermediately ( $0.025 < \text{CSP} < 0.04$ ), or strongly ( $\text{CSP} > 0.04$ ) affected by the binding are colored in tan, orange and red, respectively.
- E AtC53 IDR binding to AtUFM1 is similar to that of AtUBA5 and involves sAIM1. Overlaid  $^1\text{H}$ - $^{15}\text{N}$  HSQC spectra of isotope-labeled AtUFM1 (100  $\mu\text{M}$ ) in their free (gray) or bound state to 100  $\mu\text{M}$  unlabeled AtC53 IDR (red), 100  $\mu\text{M}$  unlabeled AtC53 IDR<sup>W276A</sup> (yellow) or 200  $\mu\text{M}$  AtUBA5 LIR/UFIM (green). Insets of chemical shift perturbations of individual peaks are shown.

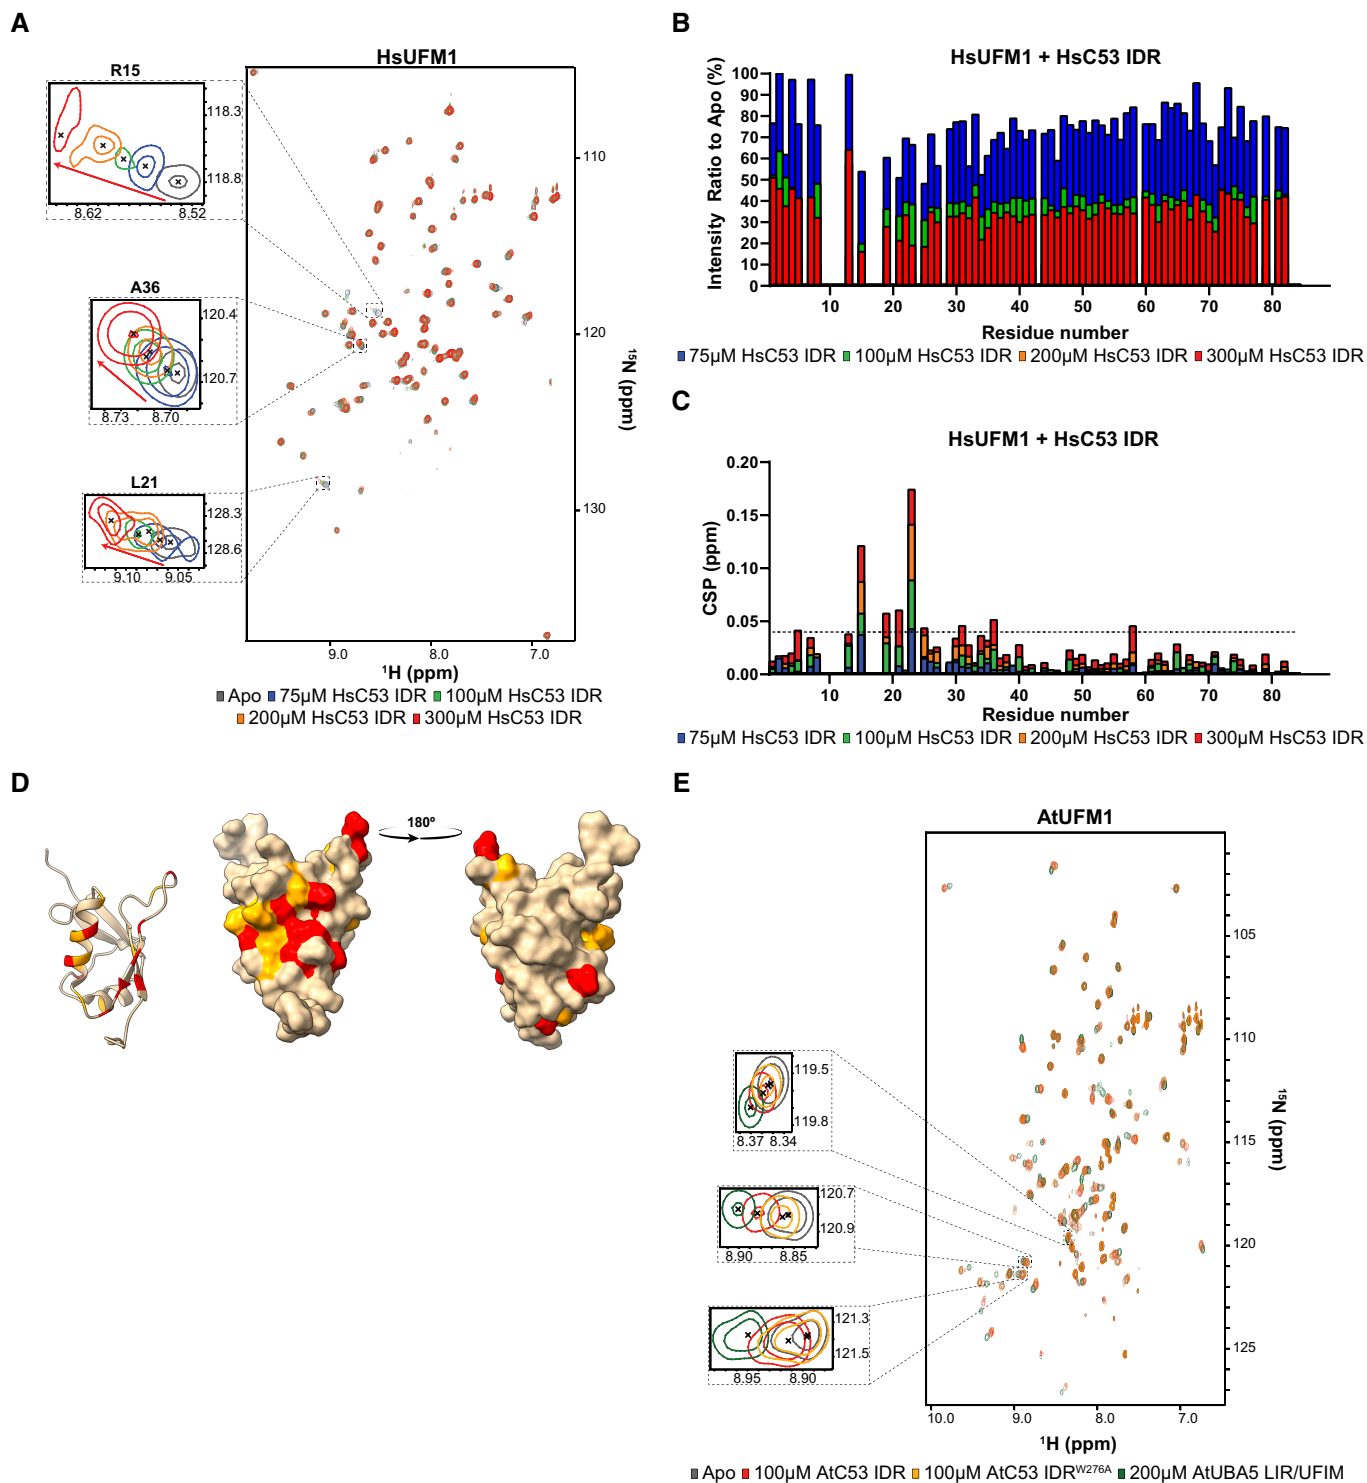

**Figure EV4. Structural characterization of ATG8 binding to C53 IDR using NMR spectroscopy.**

- A Addition of HsC53 IDR affects numerous residues in the GABARAP spectra. Overlaid  $^1\text{H}$ - $^{15}\text{N}$  HSQC spectra of isotope-labeled GABARAP (100  $\mu\text{M}$ ) in their free (gray) or bound state to 50  $\mu\text{M}$  (blue), 100  $\mu\text{M}$  (green) or 200  $\mu\text{M}$  (orange) unlabeled HsC53 IDR. Insets of individual peaks that shifted upon binding are shown.
- B HsC53 IDR binding to GABARAP causes a general signal intensity drop in GABARAP spectra. Intensity ratio broadening of GABARAP (100  $\mu\text{M}$ ) in the presence of 50  $\mu\text{M}$  (blue), 100  $\mu\text{M}$  (green) or 200  $\mu\text{M}$  (orange) unlabeled HsC53 IDR. HN resonances for residues that could not be assigned in the bound state are shown as red asterisks.
- C NMR chemical shift perturbations (CSP) of GABARAP in the presence of 50  $\mu\text{M}$  (blue), 100  $\mu\text{M}$  (green) or 200  $\mu\text{M}$  (orange) HsC53 IDR. HN resonances for residues that could not be assigned in the bound state are shown as red asterisks. The dashed line represents S.D.
- D Three-dimensional mapping of residues showing CSP in GABARAP NMR spectra upon HsC53 IDR binding. CSPs were mapped on the GABARAP structure (PDB: 6HB9) presented schematically on the left plot and as a surface representation in two projections on the right plot. Residues that are not affected or are slightly ( $\text{CSP} < 0.1$ ), intermediately ( $0.1 < \text{CSP} < 0.2$ ), or strongly ( $\text{CSP} > 0.2$ ) affected by the binding are colored in tan, orange and red, respectively. The inset highlights the position of the HP0, HP1 and HP2 hydrophobic pockets in GABARAP.
- E AtC53 IDR binding to ATG8 is similar to that of AtUBA5. Overlaid  $^1\text{H}$ - $^{15}\text{N}$  HSQC spectra of isotope-labeled ATG8A (100  $\mu\text{M}$ ) in their free (gray) or bound state to 100  $\mu\text{M}$  unlabeled AtC53 IDR (red), 100  $\mu\text{M}$  unlabeled AtC53 IDR<sup>W276A</sup> (yellow) or 200  $\mu\text{M}$  AtUBA5 LIR/UFIM (green). Insets of chemical shift perturbations of individual peaks are shown.

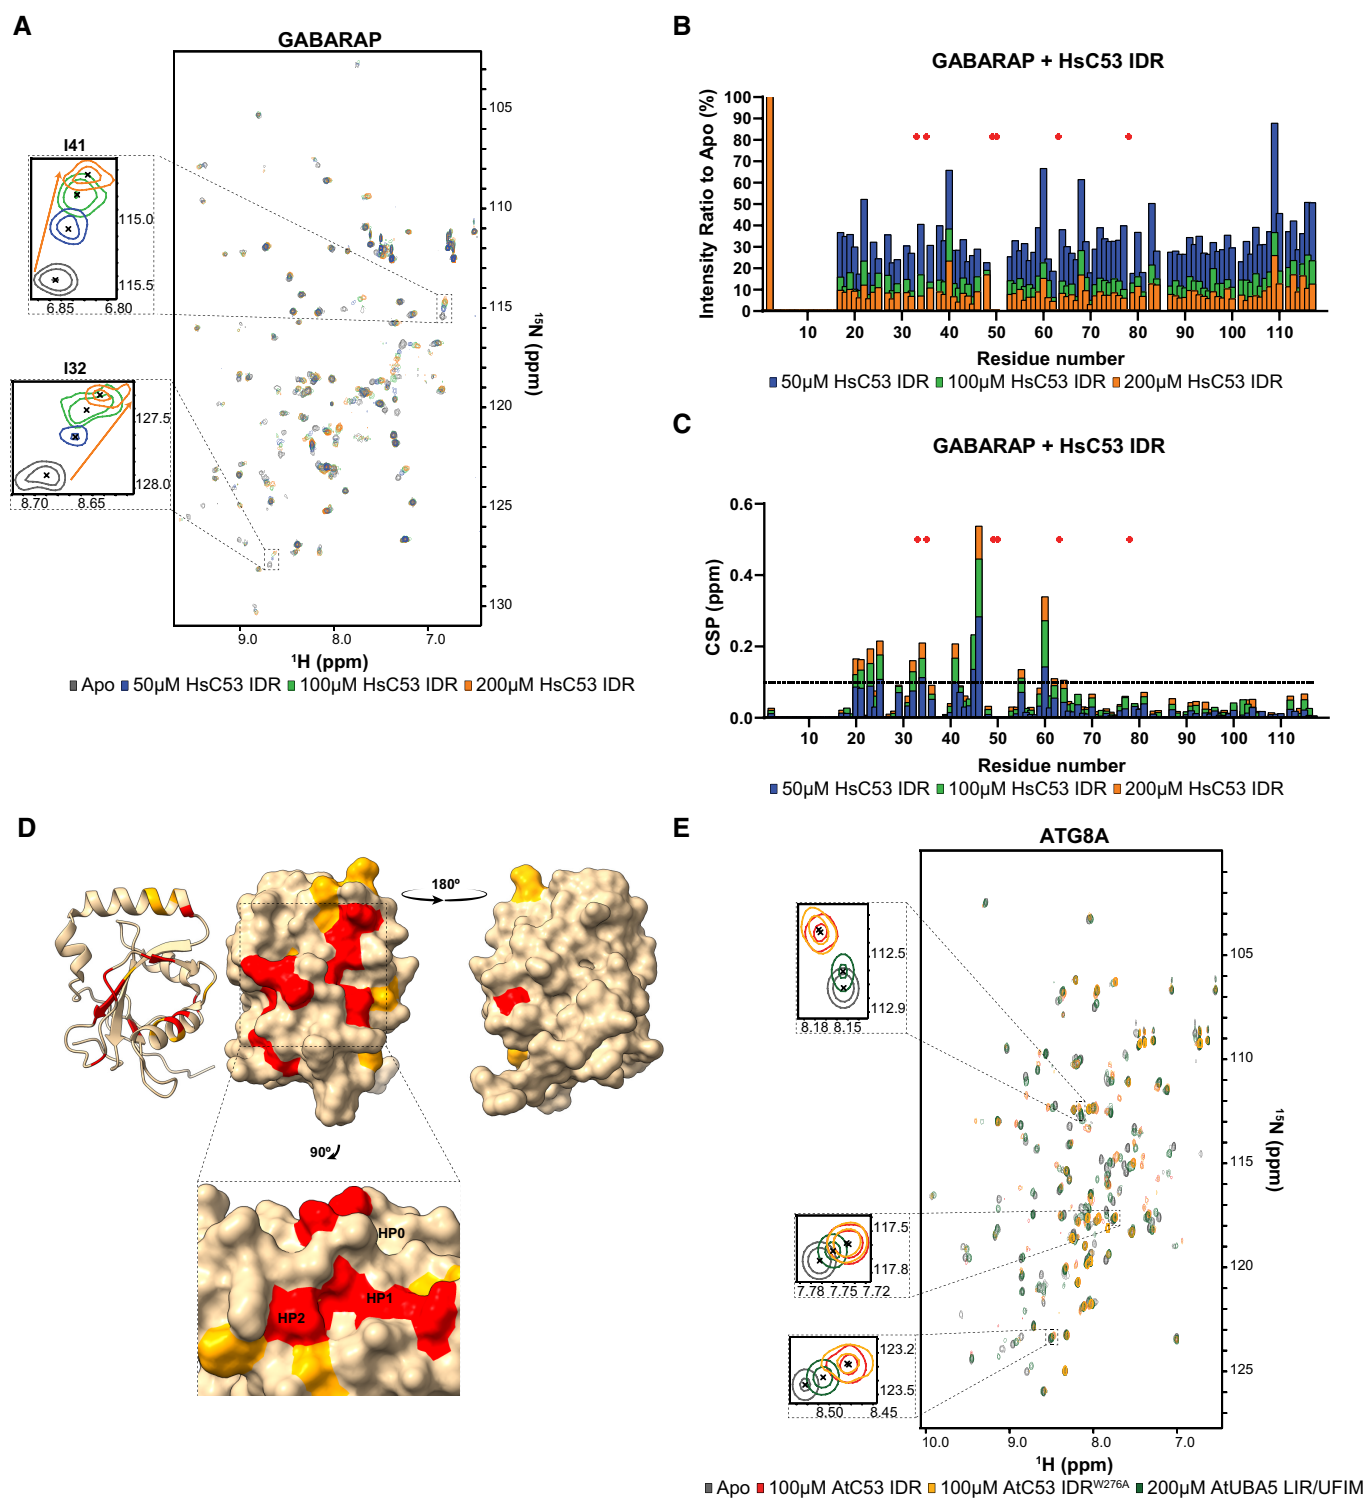

Figure EV4.



**Figure EV5. HsC53<sup>cA1M</sup> binds GABARAP with higher affinity when compared to HsC53<sup>wt</sup>.**

- A Titrations of GABARAP with HsC53<sup>wt</sup>. The concentrations of reactants are 40  $\mu\text{M}$  (1, 2, 3, 4) or 70  $\mu\text{M}$  (5) for GABARAP (in cell) and 250  $\mu\text{M}$  (1, 2, 3, 4) or 310  $\mu\text{M}$  HsC53<sup>wt</sup> (in syringe) (5).
- B Titrations of GABARAP with HsC53<sup>cA1M</sup>. The concentrations of reactants are 40  $\mu\text{M}$  (1, 2, 3, 4) or 70  $\mu\text{M}$  (5) for GABARAP (in cell) and 250  $\mu\text{M}$  (1, 2, 3, 4) or 360  $\mu\text{M}$  HsC53<sup>cA1M</sup> (in syringe) (5).
- C Titrations of GABARAP with HsC53<sup>sA1M</sup>. The concentrations of reactants are 40  $\mu\text{M}$  for GABARAP (in cell) and 250  $\mu\text{M}$  HsC53<sup>sA1M</sup>. Global analysis was performed using a hetero-association model A + B. The top panels show the SVD reconstructed thermograms, the middle panel shows the isotherms, and the bottom panel shows the residuals. Extracted global parameters and their 68.3% confidence interval are reported in the respective tables. Thermograms were reconstructed with NITPIC, global analysis was done in SEDPHAT, and data visualization was plotted in GUSSI. The dissociation constant ( $K_D$ ) is reported in  $\mu\text{M}$  units, while the enthalpy ( $\Delta H$ ) is reported in kcal/mol units.

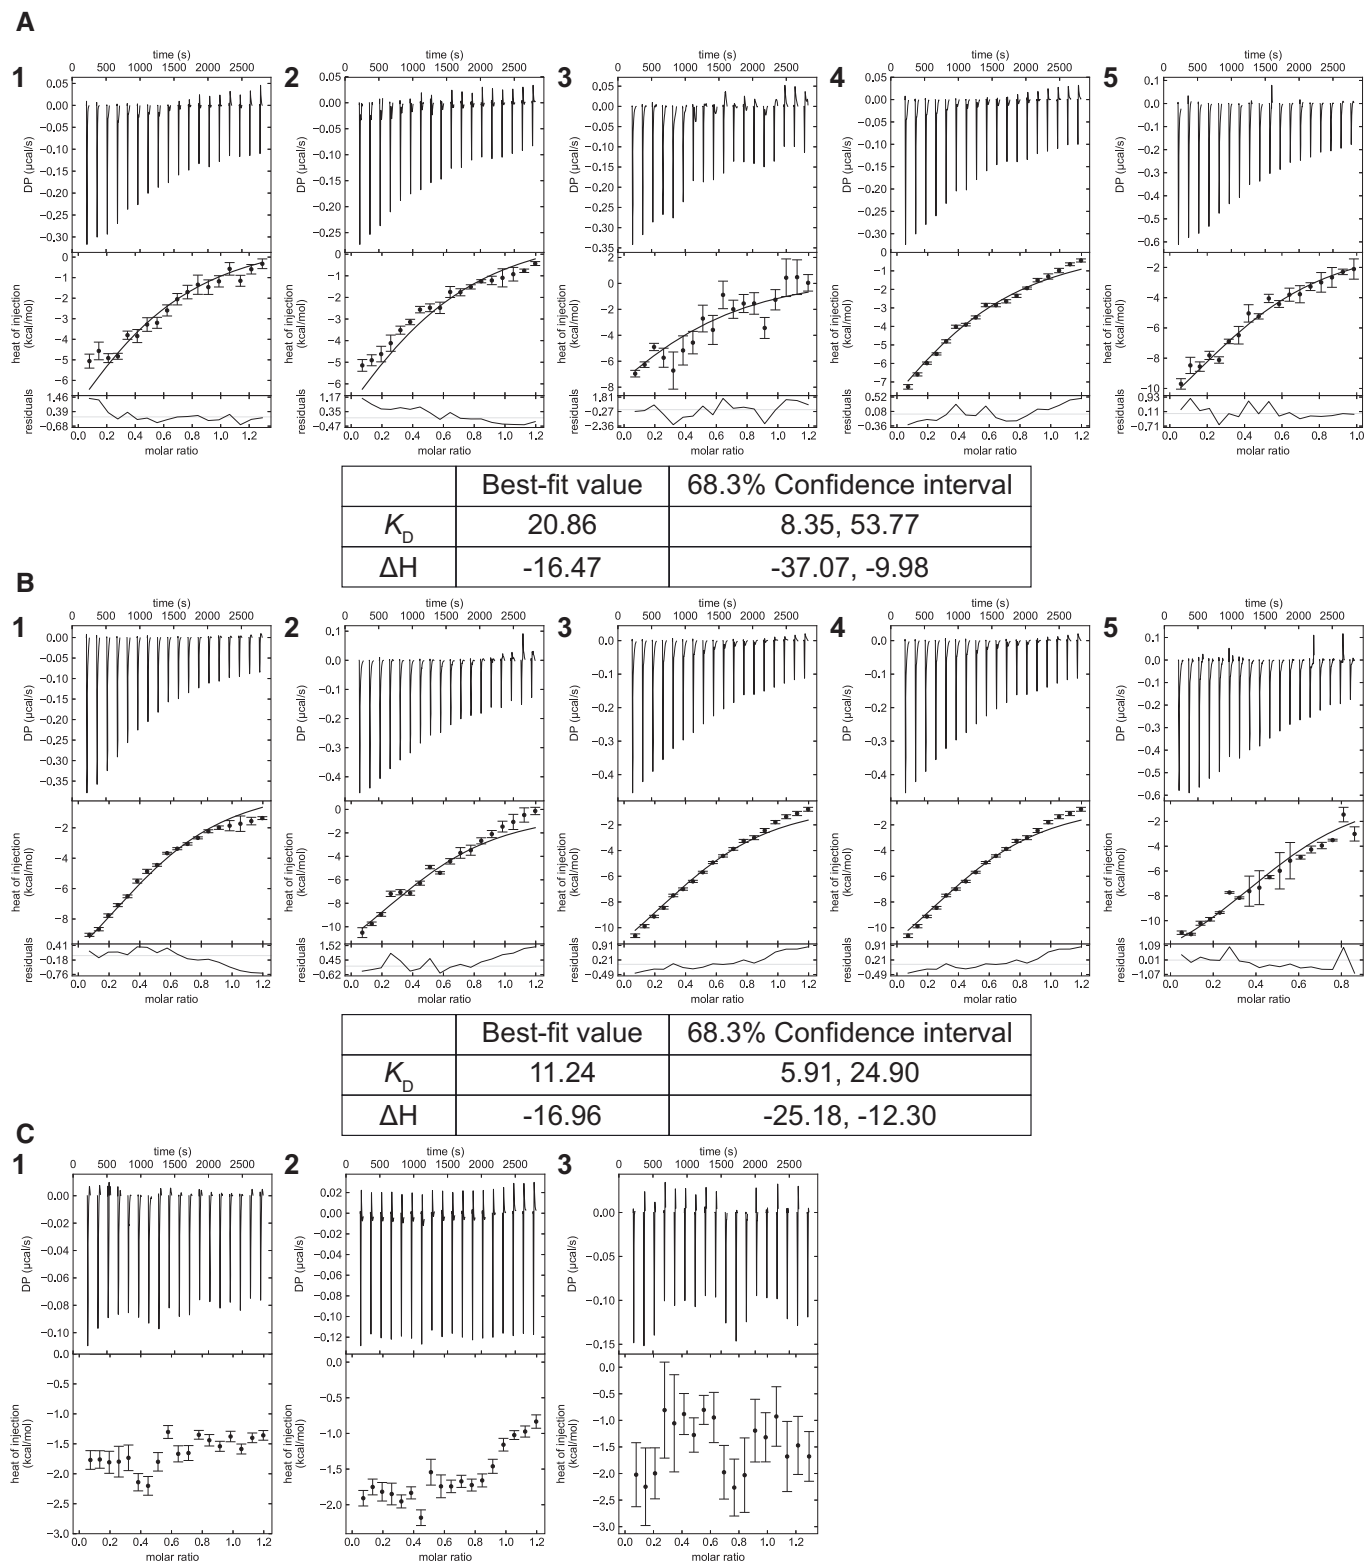

Figure EV5.
